# Supplementary material
Source: PubMed Central journal article supplement (PMC3387921)

**Me<sub>3</sub>(OMe)*t*BuXPhos: A Surrogate Ligand for Me<sub>4</sub>*t*BuXPhos in Palladium-Catalyzed C–N and C–O Bond-Forming Reactions**

Satoshi Ueda, Siraj Ali, Brett P. Fors and Stephen L. Buchwald\*

Department of Chemistry, Massachusetts Institute of Technology,  
77 Massachusetts Avenue, Cambridge, Massachusetts 02139

*Supporting Information*

NMR Spectra: S2-S26

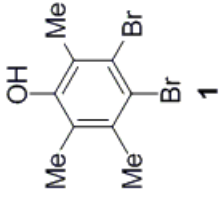

2.431  
2.402  
2.186

4.734

Current Data Parameters  
 NAME SU2-78  
 EXPNO 1  
 PROCNO 1

F2 - Acquisition Parameters  
 Date\_ 20110502  
 Time 9.18  
 INSTRUM spect  
 PROBHD 5 mm QNP 1H/13  
 PULPROG zg30  
 TD 65536  
 SOLVENT CDC13  
 NS 8  
 DS 2  
 SWH 8278.146 Hz  
 FIDRES 0.126314 Hz  
 AQ 3.9584243 sec  
 RG 256  
 DW 60.400 usec  
 DE 6.00 usec  
 TE 683.2 K  
 D1 1.00000000 sec  
 TD0 1

==== CHANNEL f1 =====  
 NUC1 1H  
 P1 14.00 usec  
 PL1 0.00 dB  
 SF01 400.1324710 MHz

F2 - Processing parameters  
 SI 65536  
 SF 400.1300097 MHz  
 WDW no  
 SSB 0  
 LB 0.00 Hz  
 GB 0  
 PC 1.00

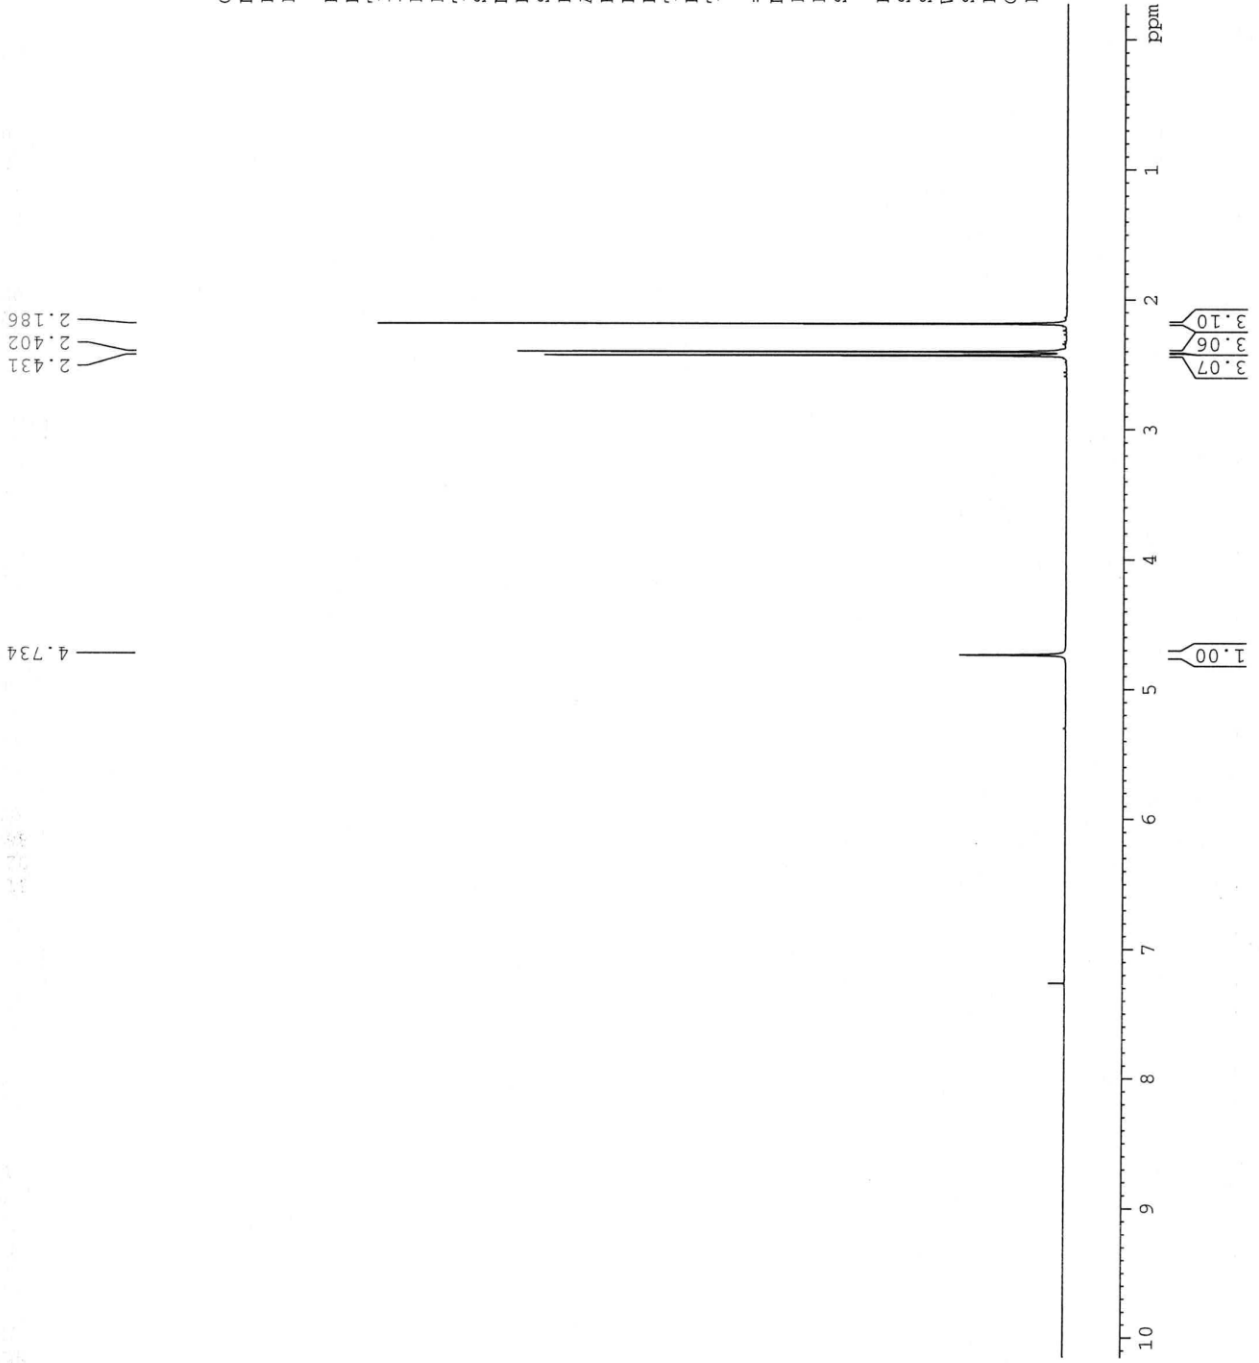

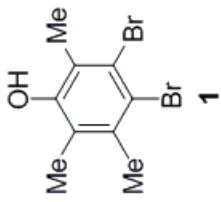

Current Data Parameters  
 NAME SU2-78C  
 EXPNO 1  
 PROCNO 1

F2 - Acquisition Parameters

Date\_ 20110502  
 Time 9.27  
 INSTRUM spect  
 PROBHD 5 mm QNP 1H/13  
 PULPROG zgpg30  
 TD 65536  
 SOLVENT CDCl3  
 NS 128  
 DS 4  
 SWH 23980.814 Hz  
 FIDRES 0.365918 Hz  
 AQ 1.3664756 sec  
 RG 2298.8  
 DW 20.850 usec  
 DE 6.00 usec  
 TE 683.2 K  
 D1 2.0000000 sec  
 d11 0.0300000 sec  
 DELTA 1.8999998 sec  
 TD0 1

==== CHANNEL f1 =====  
 NUC1 13C  
 P1 9.38 usec  
 PL1 0.00 dB  
 SFO1 100.6228298 MHz

==== CHANNEL f2 =====  
 CPDPRG2 waltz16  
 NUC2 1H  
 PCPD2 90.00 usec  
 PL2 0.00 dB  
 PL12 16.10 dB  
 PL13 19.00 dB  
 SFO2 400.1316005 MHz

F2 - Processing parameters  
 SI 32768  
 SF 100.6127544 MHz  
 WDW no  
 SSB 0  
 LB 0.00 Hz  
 GB 0  
 PC 1.40

151.23  
 136.50  
 125.29  
 123.31  
 122.71  
 119.38  
 22.27  
 18.25  
 13.66

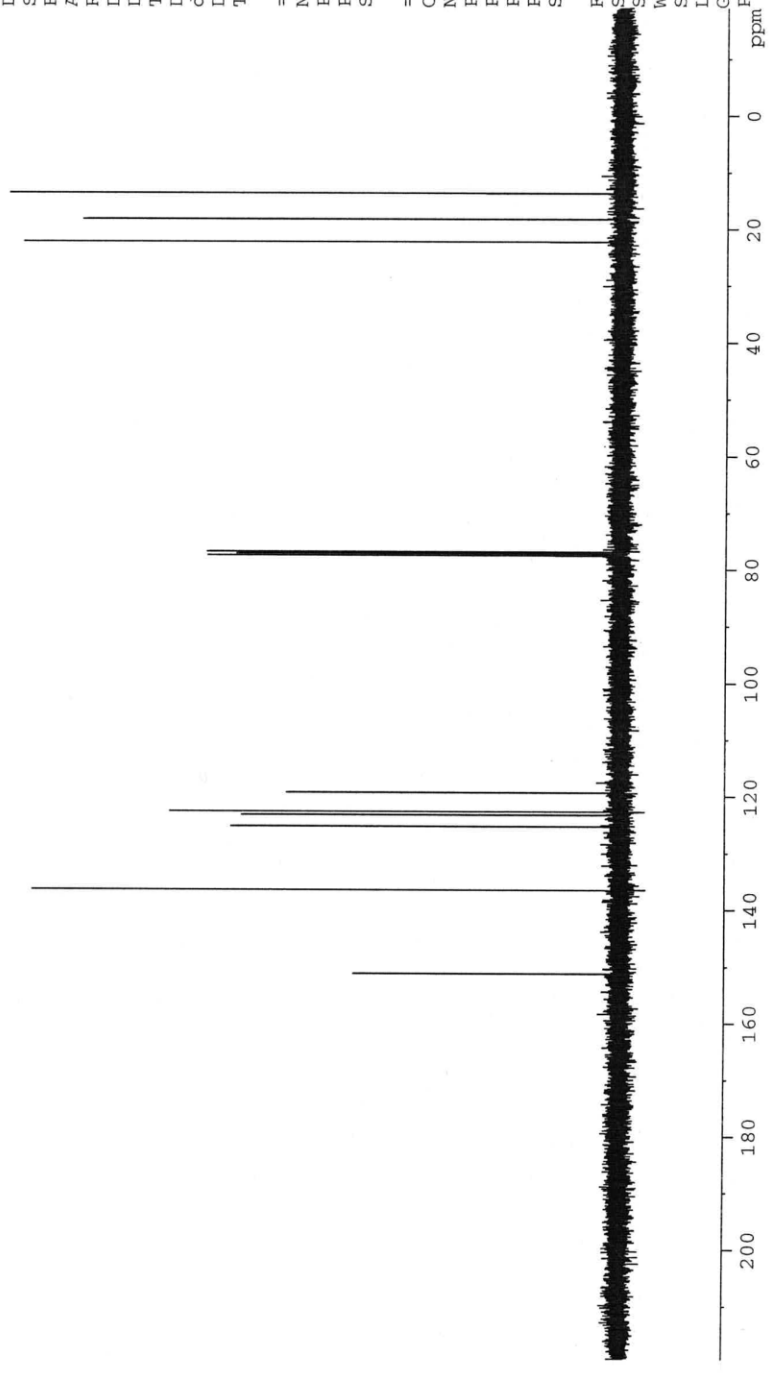

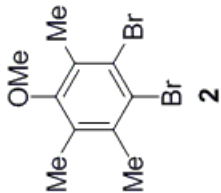

Current Data Parameters  
 NAME SU2-79  
 EXPNO 1  
 PROCNO 1

F2 - Acquisition Parameters

Date\_ 20110503  
 Time 9.22  
 INSTRUM spect  
 PROBHD 5 mm QNP 1H/13  
 PULPROG zg30  
 TD 65536  
 SOLVENT CDCl3  
 NS 8  
 DS 2  
 SWH 8278.146 Hz  
 FIDRES 0.126314 Hz  
 AQ 3.9584243 sec  
 RG 322.5  
 DW 60.400 usec  
 DE 6.00 usec  
 TE 683.2 K  
 D1 1.0000000 sec  
 TDO 1

==== CHANNEL f1 =====  
 NUC1 1H  
 P1 14.00 usec  
 PL1 0.00 dB  
 SFO1 400.1324710 MHz

F2 - Processing parameters  
 SI 65536  
 SF 400.1300096 MHz  
 WDW no  
 SSB 0  
 LB 0.00 Hz  
 GB 0  
 PC 1.00

3.652  
 2.440  
 2.424  
 2.239

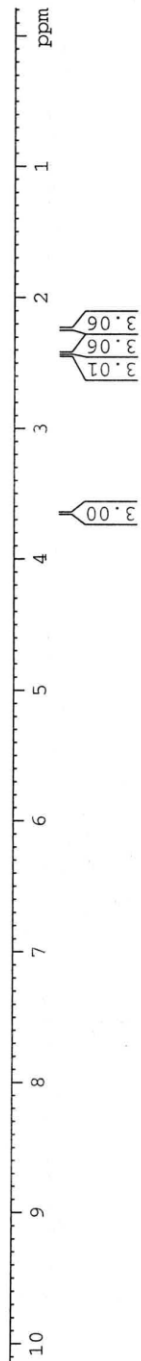

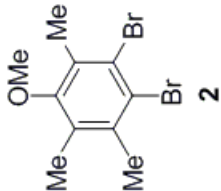

Current Data Parameters  
 NAME SU2-79C  
 EXPNO 1  
 PROCNO 1

F2 - Acquisition Parameters  
 Date\_ 20110503  
 Time 9.30  
 INSTRUM spect  
 PROBHD 5 mm QNP 1H/13  
 PULPROG zgpg30  
 TD 65536  
 SOLVENT CDCl3  
 NS 128  
 DS 4  
 SWH 23980.814 Hz  
 FIDRES 0.365918 Hz  
 AQ 1.36664756 sec  
 RG 2580.3  
 DW 20.850 usec  
 DE 6.00 usec  
 TE 683.2 K  
 D1 2.00000000 sec  
 d11 0.03000000 sec  
 DELTA 1.89999998 sec  
 TD0 1

==== CHANNEL f1 =====  
 NUC1 13C  
 P1 9.38 usec  
 PL1 0.00 dB  
 SFO1 100.6228298 MHz

==== CHANNEL f2 =====  
 CPDPRG2 waltz16  
 NUC2 1H  
 PCPD2 90.00 usec  
 PL2 0.00 dB  
 PL12 16.10 dB  
 PL13 19.00 dB  
 SFO2 400.1316005 MHz

F2 - Processing parameters  
 SI 32768  
 SF 100.6127533 MHz  
 WDW no  
 SSB 0  
 LB 0.00 Hz  
 GB 0  
 PC 1.40

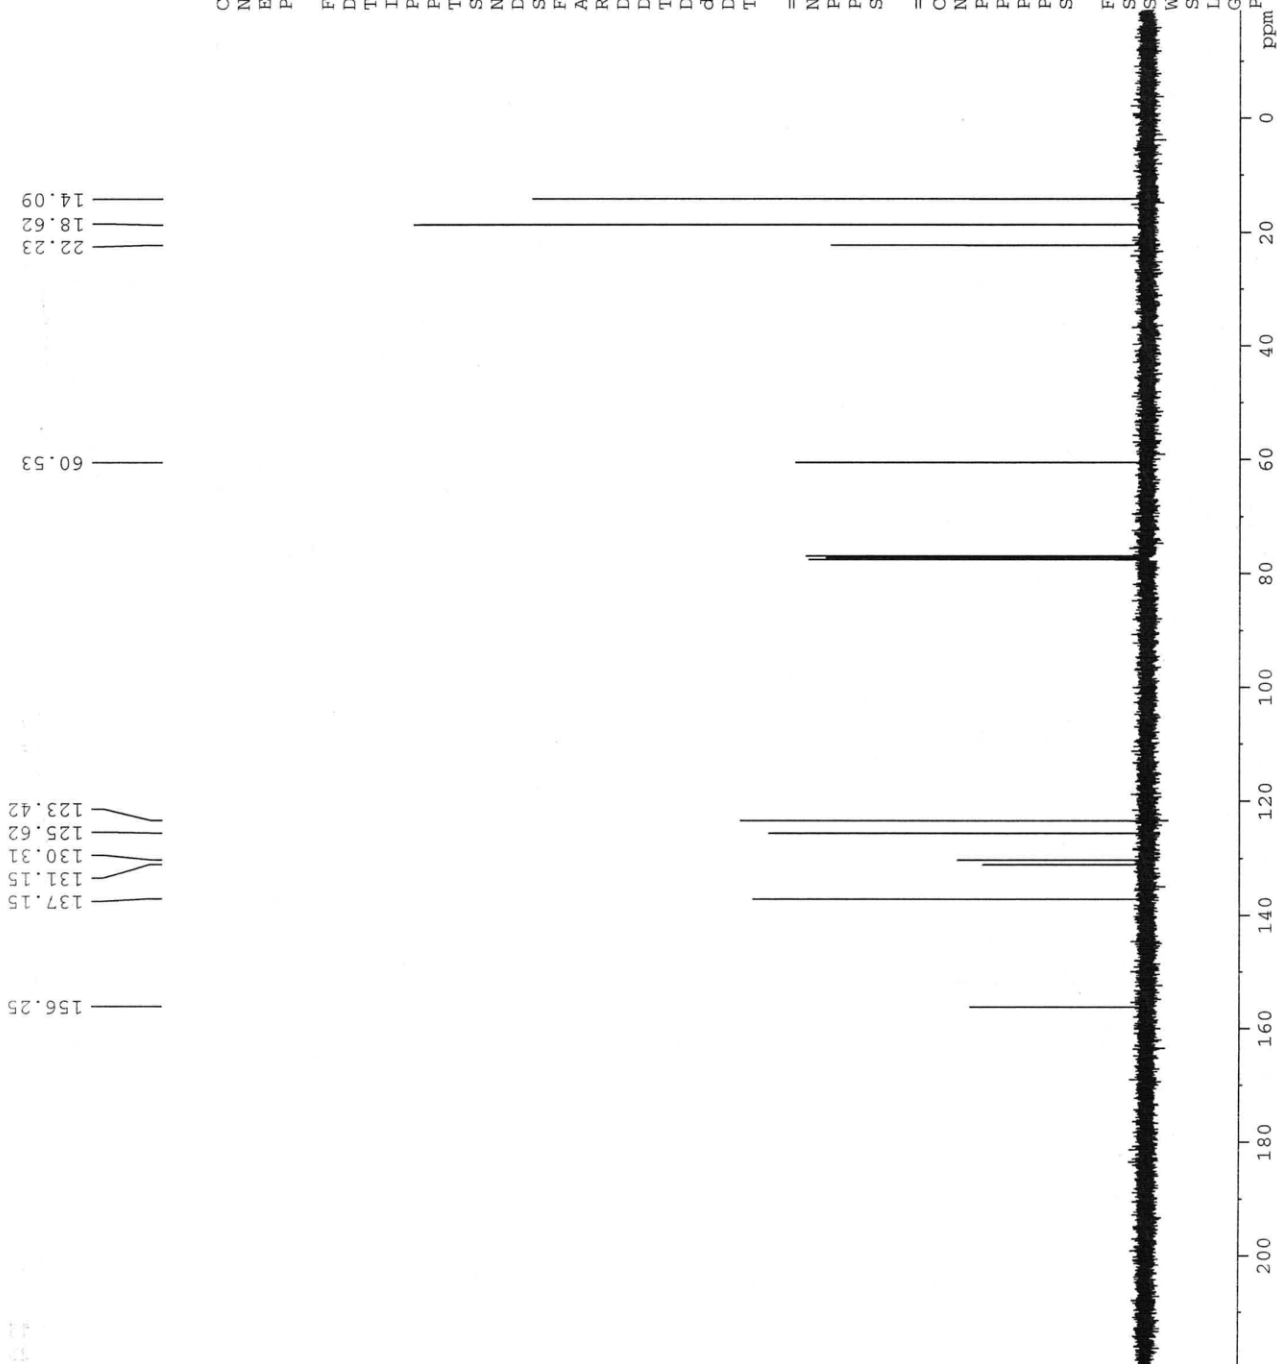

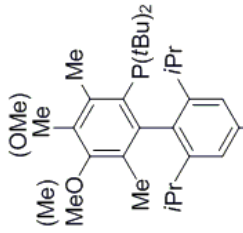

L3 *iPr*

Current Data Parameters  
 NAME SU1-275  
 EXPNO 1  
 PROCNO 1

F2 - Acquisition Parameters  
 Date\_ 20110218  
 Time 9.09  
 INSTRUM spect  
 PROBHD 5 mm QNP 1H/13  
 PULPROG zg30  
 TD 65536  
 SOLVENT CDCl3  
 NS 16  
 DS 2  
 SWH 8278.146 Hz  
 FIDRES 0.126314 Hz  
 AQ 3.9584243 sec  
 RG 32  
 DW 60.400 usec  
 DE 6.00 usec  
 TE 294.2 K  
 D1 1.00000000 sec  
 TD0 1

==== CHANNEL f1 =====  
 NUC1 1H  
 P1 14.00 usec  
 PL1 0.00 dB  
 SFO1 400.1324710 MHz

F2 - Processing parameters  
 SI 65536  
 SF 400.1300097 MHz  
 WDW no  
 SSB 0  
 LB 0.00 Hz  
 GB 0  
 PC 1.00

3.761  
 3.687  
 2.975  
 2.958  
 2.941  
 2.924  
 2.907  
 2.889  
 2.871  
 2.577  
 2.544  
 2.470  
 2.453  
 2.437  
 2.425  
 2.420  
 2.408  
 2.392  
 2.375  
 2.266  
 2.209  
 1.766  
 1.744  
 1.301  
 1.283  
 1.224  
 1.208  
 1.152  
 1.151

7.260  
 6.964  
 6.955

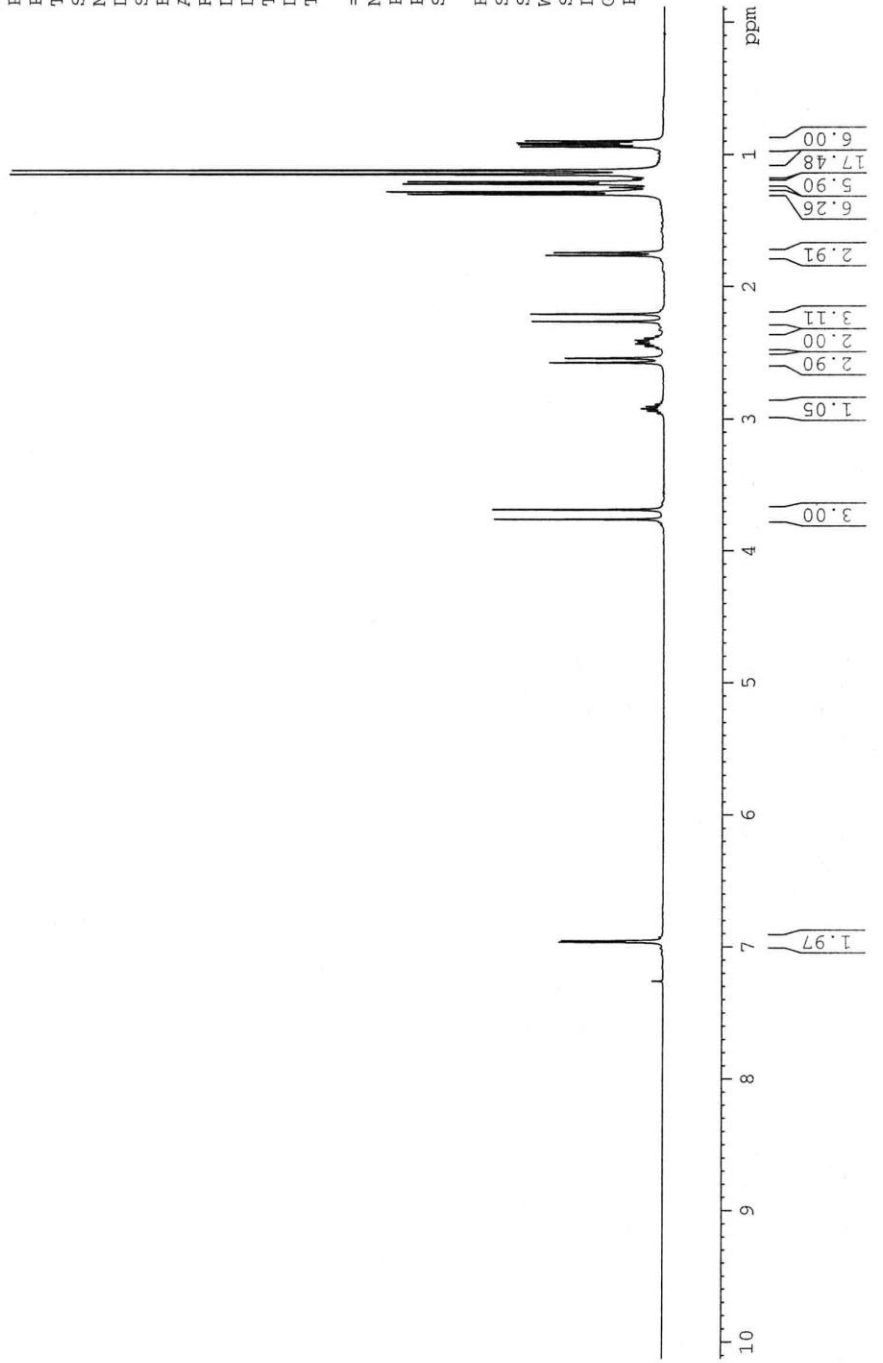

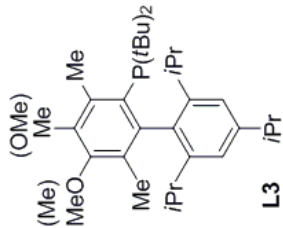

Current Data Parameters  
 NAME SU1-275C  
 EXPNO 1  
 PROCNO 1

F2 - Acquisition Parameters  
 Date\_ 20110218  
 Time 9.33  
 INSTRUM spect  
 PROBHD 5 mm QNP 1H/13  
 PULPROG zgpg30  
 TD 65536  
 SOLVENT CDCl3  
 NS 400  
 DS 4  
 SWH 23980.814 Hz  
 FIDRES 0.365918 Hz  
 AQ 1.3664756 sec  
 RG 3649.1  
 DW 20.850 usec  
 DE 6.00 usec  
 TE 296.2 K  
 D1 2.00000000 sec  
 d11 0.03000000 sec  
 DELTA 1.89999998 sec  
 TD0 1

==== CHANNEL f1 =====  
 NUC1 13C  
 P1 9.38 usec  
 PL1 0.00 dB  
 SFO1 100.6228298 MHz

==== CHANNEL f2 =====  
 CPDPRG2 waltz16  
 NUC2 1H  
 PCPD2 90.00 usec  
 PL2 0.00 dB  
 PLI2 16.10 dB  
 PLI3 19.00 dB  
 SFO2 400.1316005 MHz

F2 - Processing parameters  
 SI 32768  
 SF 100.6127480 MHz  
 WDW no  
 SSB 0  
 LB 0  
 GB 0  
 PC 1.40

157.73  
157.72  
155.79  
150.02  
149.56  
147.49  
147.47  
146.57  
146.52  
146.51  
146.22  
146.13  
141.61  
141.57  
138.14  
138.06  
137.81  
137.73  
136.51  
136.12  
136.03  
133.97  
133.94  
133.49  
133.01  
130.44  
128.96  
128.86  
127.59  
120.69  
120.61

59.67  
59.56  
34.65  
34.54  
34.28  
34.19  
32.82  
32.65  
31.02  
30.99  
26.19  
26.17  
21.92  
21.91  
21.06  
21.03  
17.21  
17.18  
13.57

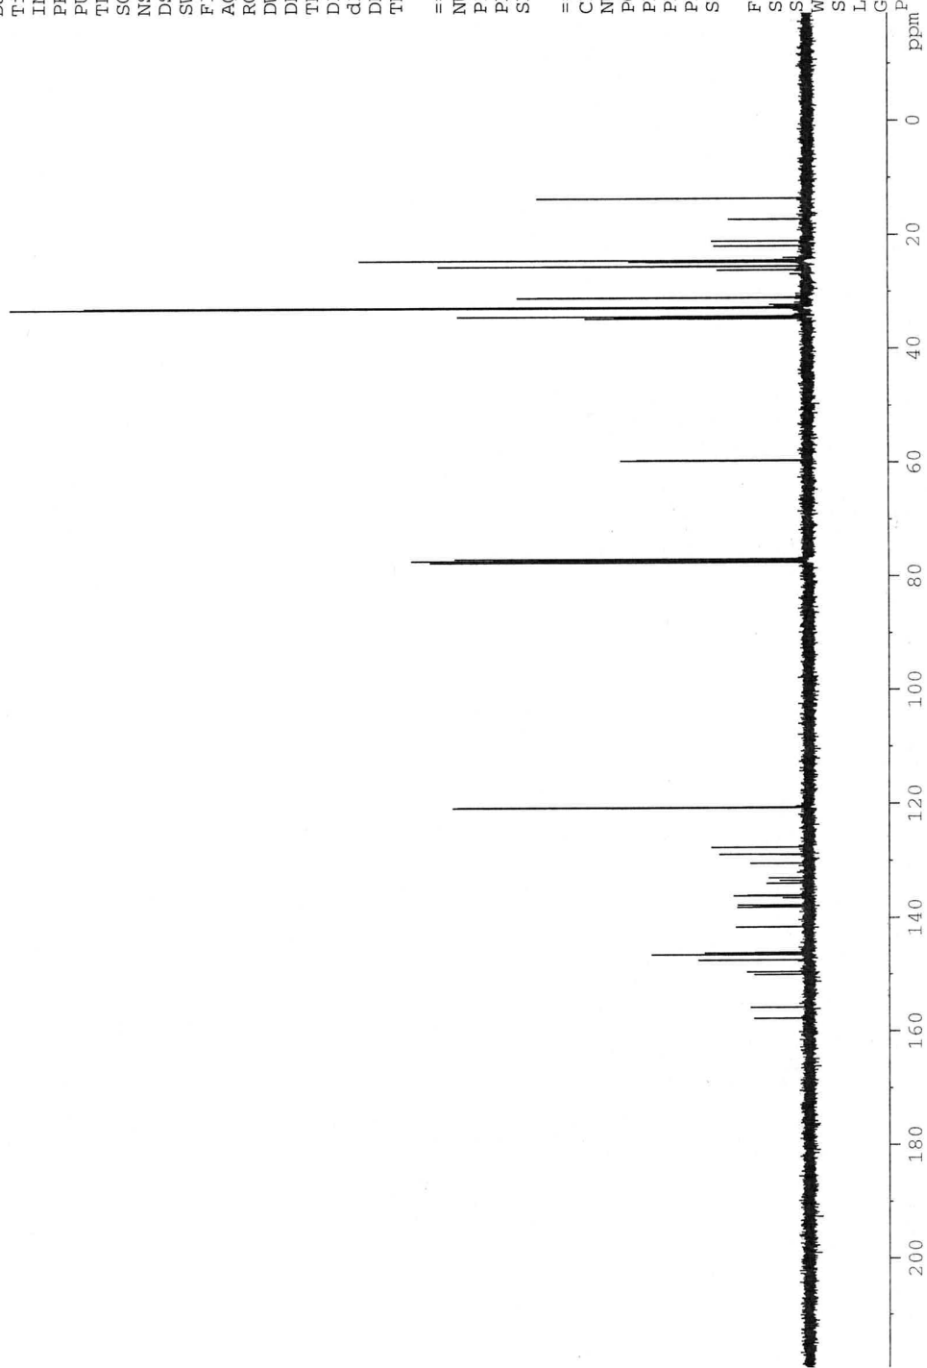

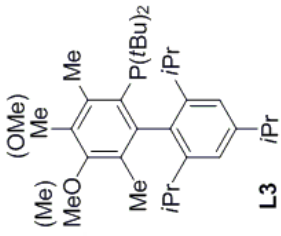

Current Data Parameters  
 NAME SU1-275P  
 EXPNO 1  
 PROCNO 1

F2 - Acquisition Parameters  
 Date\_ 20110218  
 Time 9.34  
 INSTRUM spect  
 PROBHD 5 mm QNP 1H/13  
 PULPROG zgpg30  
 TD 65536  
 SOLVENT CDCl3  
 NS 16  
 DS 4  
 SWH 64935.066 Hz  
 FIDRES 0.990830 Hz  
 AQ 0.5046772 sec  
 RG 4096  
 DW 7.700 usec  
 DE 6.00 usec  
 TE 296.2 K  
 D1 2.00000000 sec  
 d11 0.03000000 sec  
 DELTA 1.899999998 sec  
 TD0 1

==== CHANNEL f1 =====  
 NUC1 31P  
 P1 9.25 usec  
 PL1 3.00 dB  
 SFO1 161.9674940 MHz

==== CHANNEL f2 =====  
 CPDPRG2 waltz16  
 NUC2 1H  
 PCPD2 90.00 usec  
 PL2 0.00 dB  
 PL12 16.10 dB  
 PL13 19.00 dB  
 SFO2 400.1316000 MHz

F2 - Processing parameters  
 SI 65536  
 SF 161.9755024 MHz  
 WDW no  
 SSB 0  
 LB 0.00 Hz  
 GB 0  
 PC 1.40

39.32  
 38.30

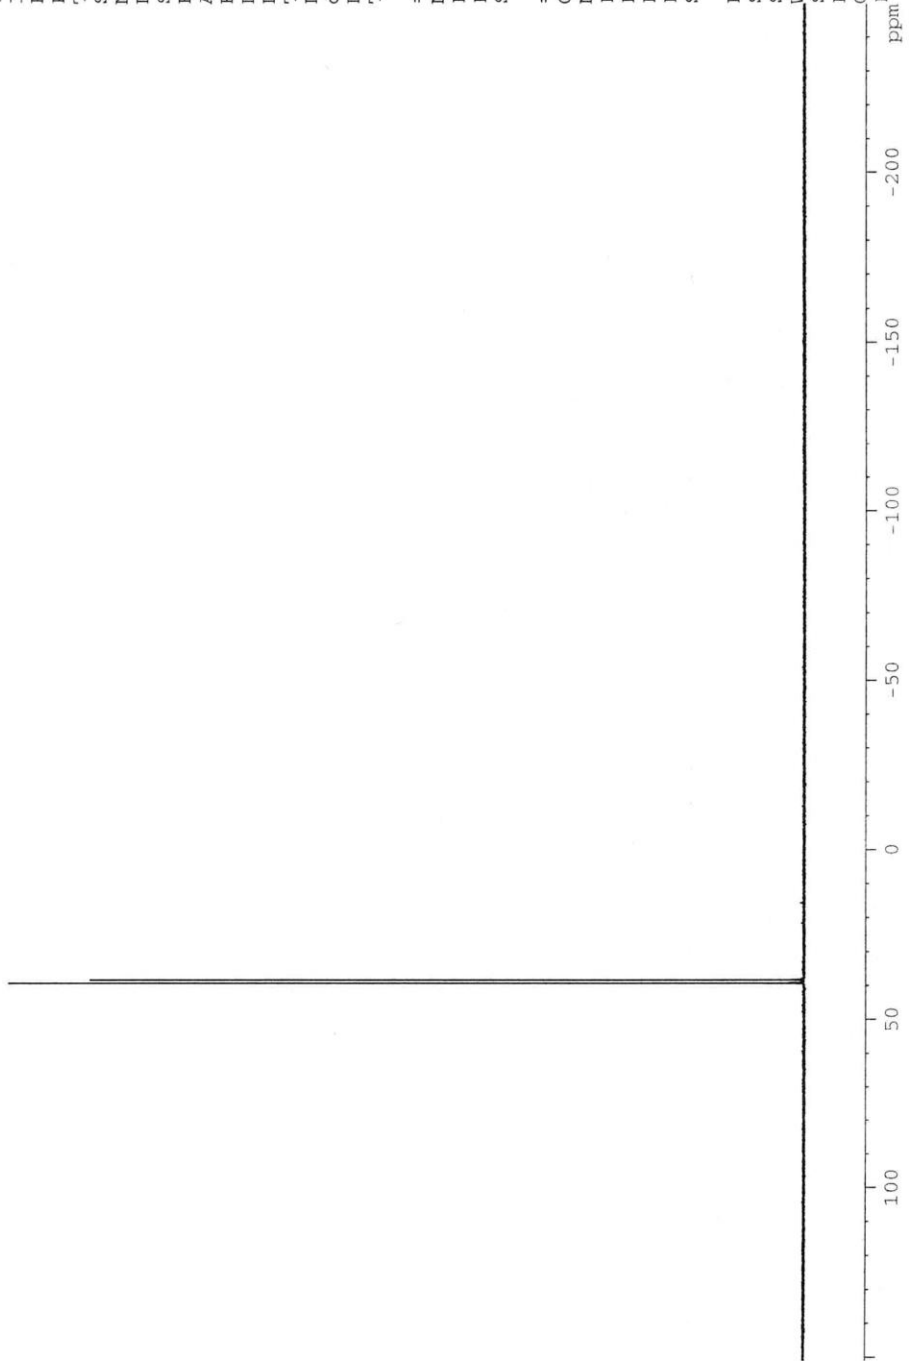



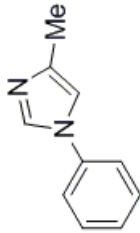

3a

Current Data Parameters  
 NAME SUI-246  
 EXPNO 1  
 PROCNO 1

F2 - Acquisition Parameters  
 Date\_ 20110201  
 Time 10.43  
 INSTRUM spect  
 PROBHD 5 mm QNP 1H/13  
 PULPROG zg30  
 TD 65536  
 SOLVENT CDCl3  
 NS 8  
 DS 2  
 SWH 8278.146 Hz  
 FIDRES 0.126314 Hz  
 AQ 3.9584243 sec  
 RG 57  
 DW 60.400 usec  
 DE 6.00 usec  
 TE 295.2 K  
 D1 1.00000000 sec  
 TD0 1

==== CHANNEL f1 =====  
 NUC1 1H  
 P1 14.00 usec  
 PL1 0.00 dB  
 SFO1 400.1324710 MHz

F2 - Processing parameters  
 SI 65536  
 SF 400.1300101 MHz  
 WDW no  
 SSB 0  
 LB 0.00 Hz  
 GB 0  
 PC 1.00

7.643  
7.639  
7.346  
7.345  
7.343  
7.340  
7.327  
7.326  
7.324  
7.323  
7.306  
7.305  
7.233  
7.232  
7.229  
7.210  
7.207  
7.202  
7.184  
6.887

2.204

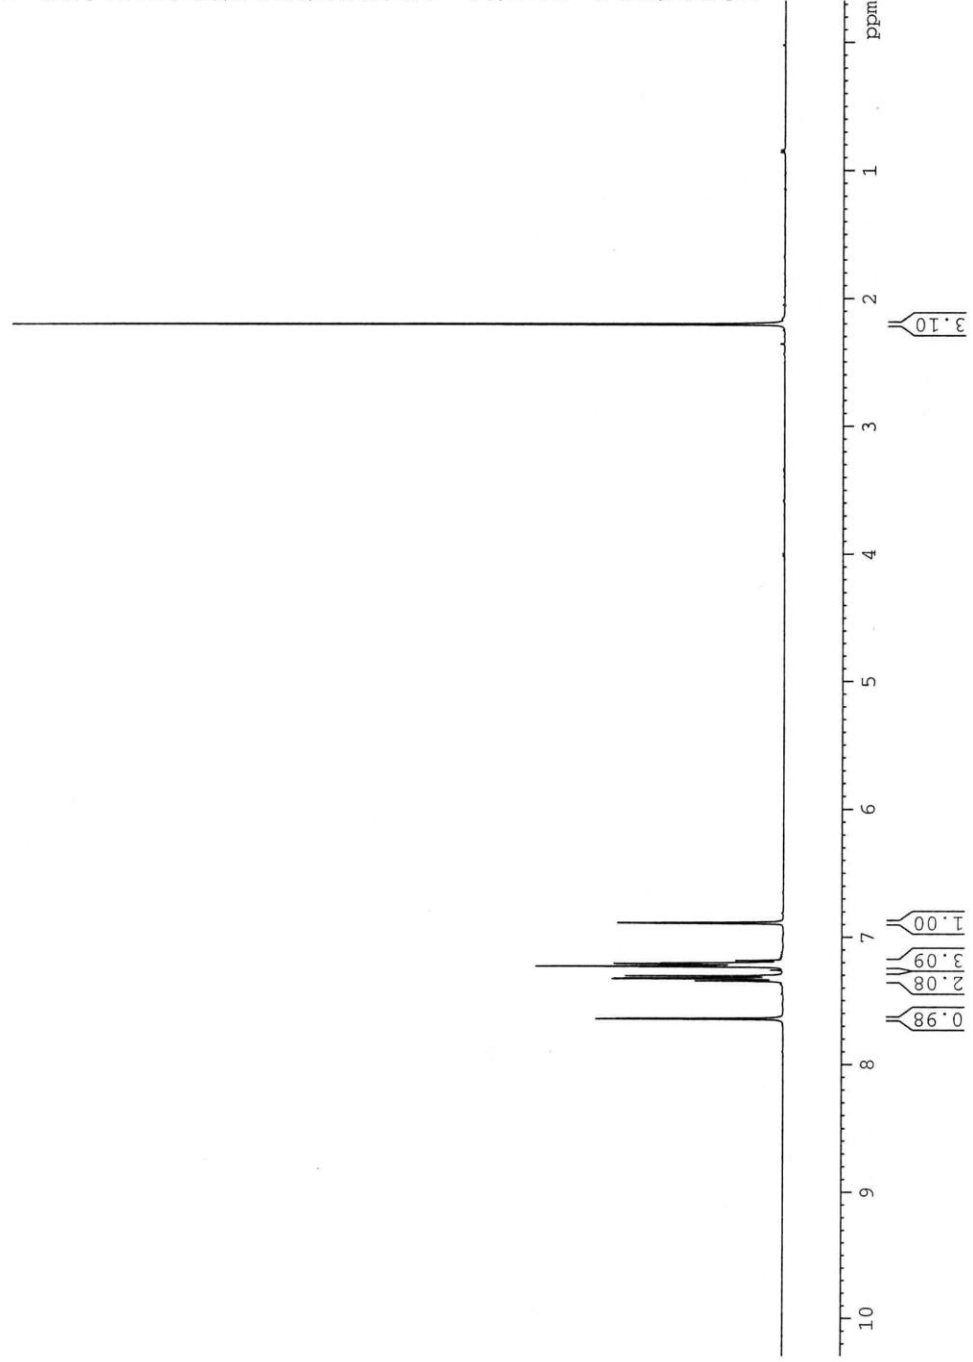

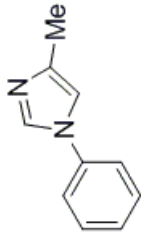

3a

Current Data Parameters  
 NAME SUI-246C  
 EXPNO 1  
 PROCNO 1

F2 - Acquisition Parameters  
 Date\_ 20110201  
 Time 10.51  
 INSTRUM spect  
 PROBHD 5 mm QNP 1H/13  
 PULPROG zgpg30  
 TD 65536  
 SOLVENT CDCl3  
 NS 128  
 DS 4  
 SWH 23980.814 Hz  
 FIDRES 0.365918 Hz  
 AQ 1.3664756 sec  
 RG 1625.5  
 DW 20.850 usec  
 DE 6.00 usec  
 TE 296.2 K  
 D1 2.00000000 sec  
 d11 0.03000000 sec  
 DELTA 1.89999998 sec  
 TD0 1

==== CHANNEL f1 =====  
 NUC1 13C  
 P1 9.38 usec  
 PL1 0.00 dB  
 SFO1 100.6228298 MHz

==== CHANNEL f2 =====  
 CPDPRG2 waltz16  
 NUC2 1H  
 PCPD2 90.00 usec  
 PL2 0.00 dB  
 PLI2 16.10 dB  
 PLI3 19.00 dB  
 SFO2 400.1316005 MHz

F2 - Processing parameters  
 SI 32768  
 SF 100.6127754 MHz

WDW no  
 SSB 0  
 LB 0.00 Hz  
 GB 0  
 PC 1.40

13.61

139.37  
 137.33  
 134.40  
 129.66  
 126.90  
 120.82  
 114.41

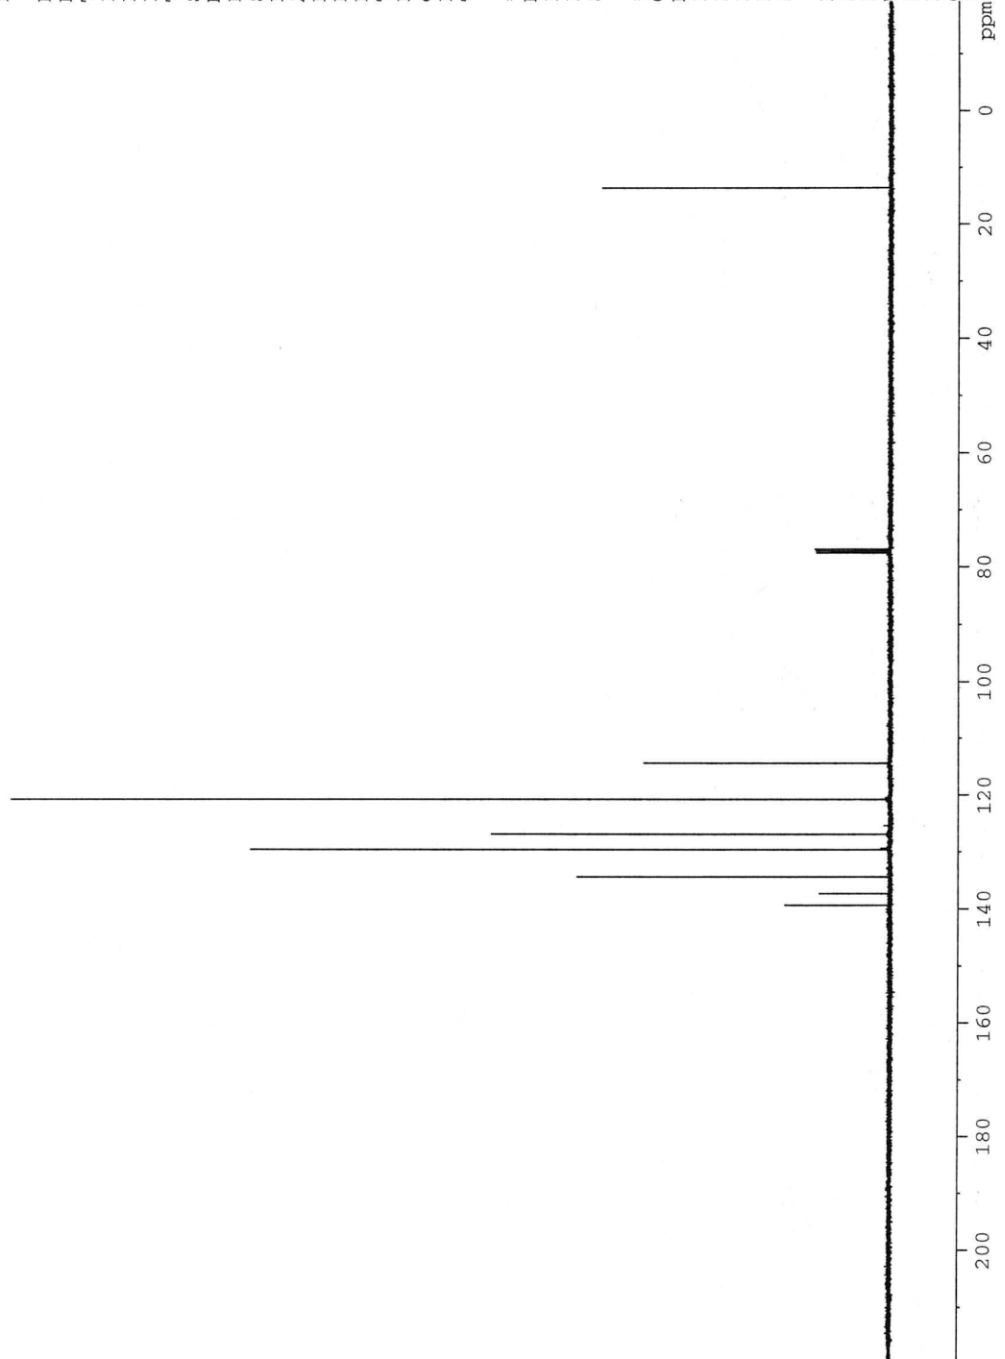

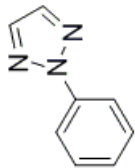

**3b**

Current Data Parameters  
 NAME SU1-247  
 EXPNO 1  
 PROCNO 1

F2 - Acquisition Parameters  
 Date\_ 20110506  
 Time 10.14  
 INSTRUM spect  
 PROBHD 5 mm QNP 1H/13  
 PULPROG zg30  
 TD 65536  
 SOLVENT CDCl3  
 NS 8  
 DS 2  
 SWH 8278.146 Hz  
 FIDRES 0.126314 Hz  
 AQ 3.9584243 sec  
 RG 322.5  
 DW 60.400 usec  
 DE 6.00 usec  
 TE 683.2 K  
 DI 1.00000000 sec  
 TD0 1

==== CHANNEL f1 =====  
 NUC1 1H  
 P1 14.00 usec  
 PL1 0.00 dB  
 SFO1 400.1324710 MHz

F2 - Processing parameters  
 SI 65536  
 SF 400.1300095 MHz  
 WDW no  
 SSB 0  
 LB 0.00 Hz  
 GB 0  
 PC 1.00

8.114  
8.111  
8.106  
8.097  
8.095  
8.092  
8.089  
8.089  
7.798  
7.494  
7.489  
7.480  
7.475  
7.473  
7.468  
7.458  
7.453  
7.449  
7.356  
7.353  
7.351  
7.339  
7.338  
7.335  
7.331  
7.319  
7.316  
7.314

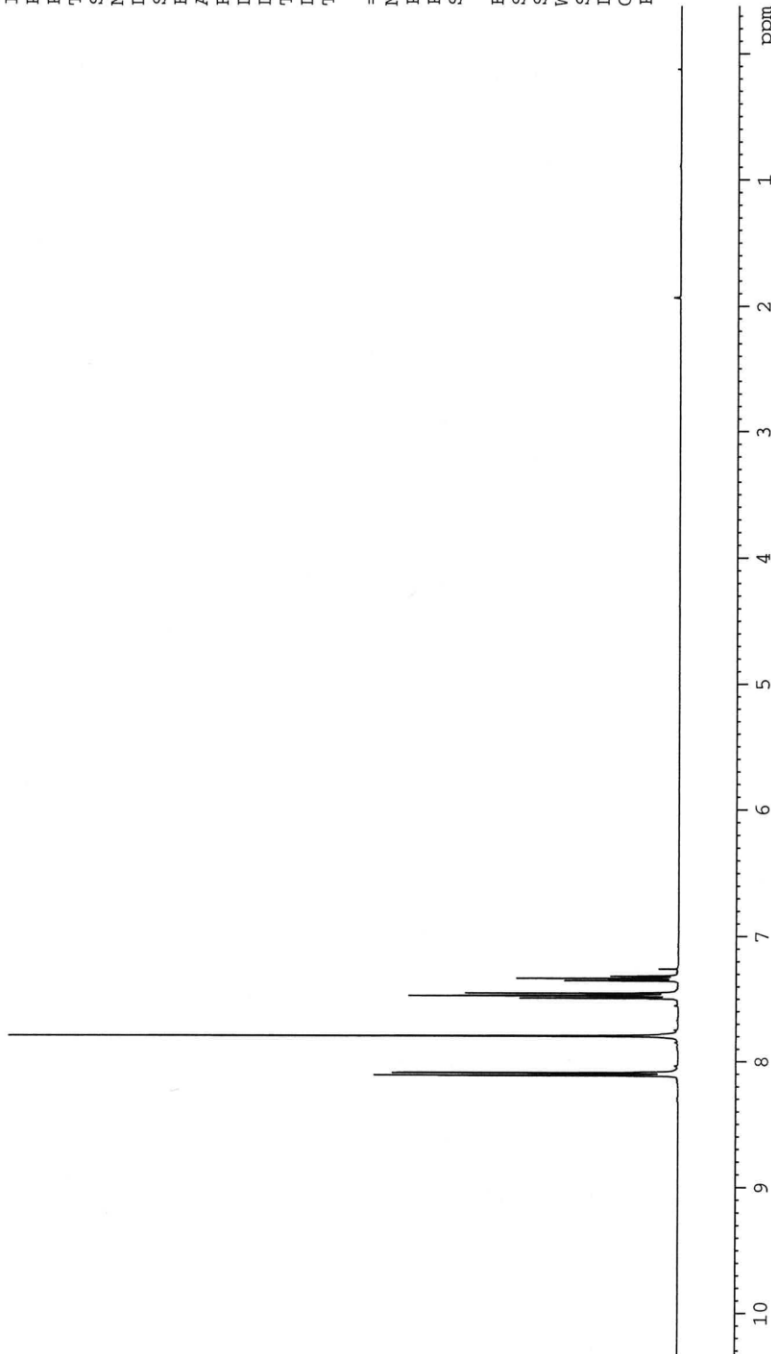

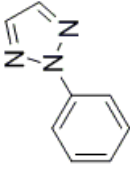

**3b**

Current Data Parameters  
 NAME SU1-247C  
 EXPNO 1  
 PROCNO 1

F2 - Acquisition Parameters

Date\_ 20110506  
 Time 10.23  
 INSTRUM spect  
 PROBHD 5 mm QNP 1H/13  
 PULPROG zgpg30  
 TD 65536  
 SOLVENT CDCl3  
 NS 128  
 DS 4  
 SWH 23980.814 Hz  
 FIDRES 0.365918 Hz  
 AQ 1.3664756 sec  
 RG 5160.6  
 DW 20.850 usec  
 DE 6.00 usec  
 TE 683.2 K  
 D1 2.00000000 sec  
 d11 0.03000000 sec  
 DELTA 1.89999998 sec  
 TD0 1

==== CHANNEL f1 =====  
 NUC1 13C  
 P1 9.38 usec  
 PL1 0.00 dB  
 SFO1 100.6228298 MHz

==== CHANNEL f2 =====  
 CPDPRG2 waltz16  
 NUC2 1H  
 P2 90.00 usec  
 PL2 0.00 dB  
 PL12 16.10 dB  
 PL13 19.00 dB  
 SFO2 400.1316005 MHz

F2 - Processing parameters  
 SI 32768  
 SF 100.6127589 MHz  
 WDW no  
 SSB 0  
 LB 0.00 Hz  
 GB 0  
 PC 1.40

140.01  
 135.61  
 129.40  
 127.64  
 119.06

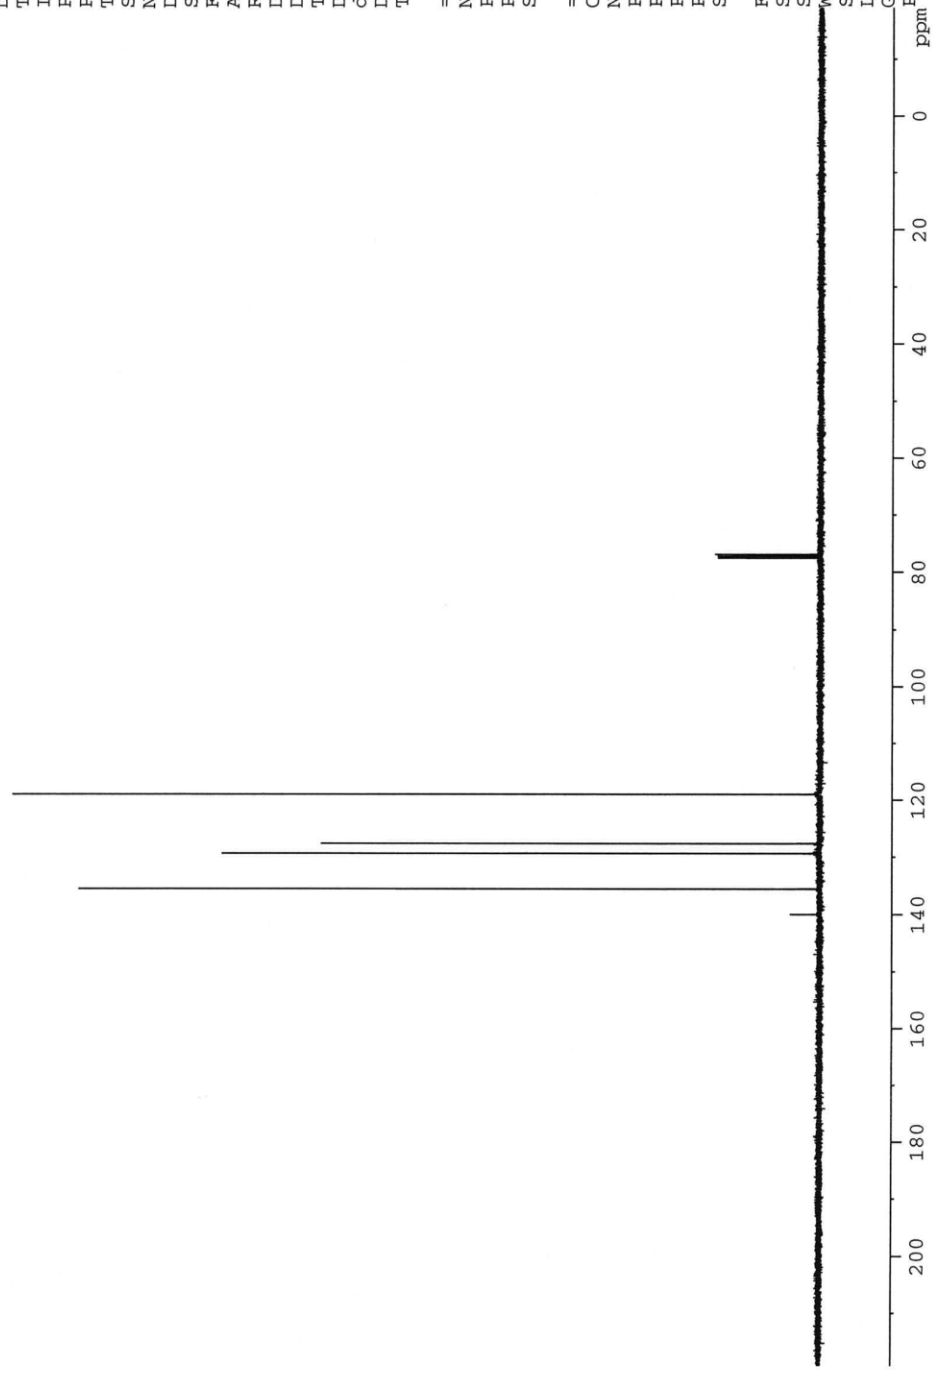

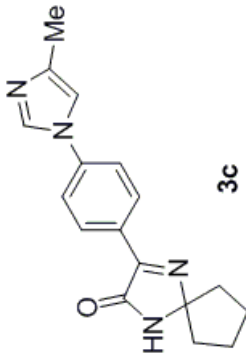

Current Data Parameters  
 NAME SUI-257-2  
 EXPNO 1  
 PROCNO 1

F2 - Acquisition Parameters  
 Date\_ 20110208  
 Time 9.17  
 INSTRUM spect  
 PROBHD 5 mm QNP 1H/13  
 PULPROG zg30  
 TD 65536  
 SOLVENT DMSO  
 NS 16  
 DS 2  
 SWH 8278.146 Hz  
 FIDRES 0.126314 Hz  
 AQ 3.9584243 sec  
 RG 128  
 DW 60.400 usec  
 DE 6.00 usec  
 TE 295.2 K  
 D1 1.00000000 sec  
 TD0 1

==== CHANNEL f1 =====  
 NUC1 1H  
 P1 14.00 usec  
 PL1 0.00 dB  
 SF01 400.1324710 MHz

F2 - Processing parameters  
 SI 65536  
 SF 400.1300031 MHz  
 WDW no  
 SSB 0  
 LB 0.00 Hz  
 GB 0  
 PC 1.00

2.169  
1.977  
1.923  
1.909  
1.902  
1.892  
1.887  
1.826

8.432  
8.410  
8.260  
7.752  
7.730  
7.525

10.088

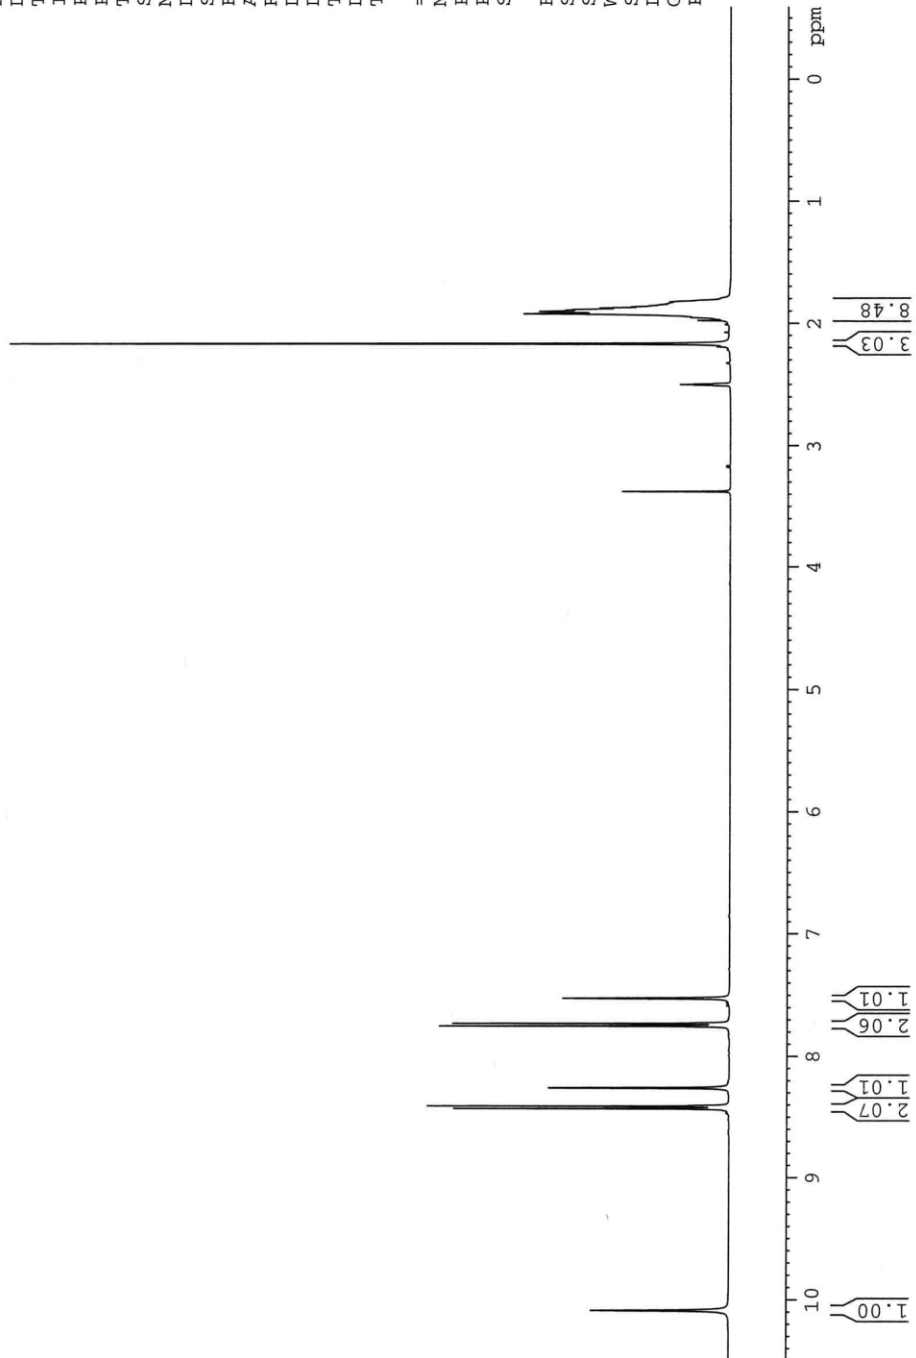

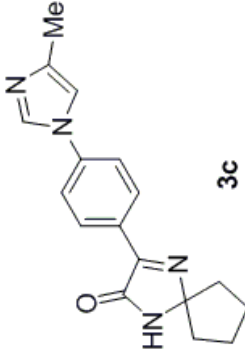

Current Data Parameters  
 NAME SU1-257-2C  
 EXPNO 1  
 PROCNO 1

F2 - Acquisition Parameters  
 Date\_ 20110208  
 Time 9.32  
 INSTRUM spect  
 PROBHD 5 mm QNP 1H/13  
 PULPROG zgpg30  
 TD 65536  
 SOLVENT DMSO  
 NS 256  
 DS 4  
 SWH 23980.814 Hz  
 FIDRES 0.365918 Hz  
 AQ 1.3664756 sec  
 RG 1625.5  
 DW 20.850 usec  
 DE 6.00 usec  
 TE 296.2 K  
 D1 2.00000000 sec  
 d11 0.03000000 sec  
 DELTA 1.89999998 sec  
 TD0 1

==== CHANNEL f1 =====  
 NUC1 13C  
 P1 9.38 usec  
 PL1 0.00 dB  
 SF01 100.6228298 MHz

==== CHANNEL f2 =====  
 CPDPRG2 waltz16  
 NUC2 1H  
 PCPD2 90.00 usec  
 PL2 0.00 dB  
 PL12 16.10 dB  
 PL13 19.00 dB  
 SF02 400.1316005 MHz

F2 - Processing parameters  
 SI 32768  
 SF 100.6128158 MHz  
 WDW no  
 SSB 0  
 LB 0.00 Hz  
 GB 0  
 PC 1.40

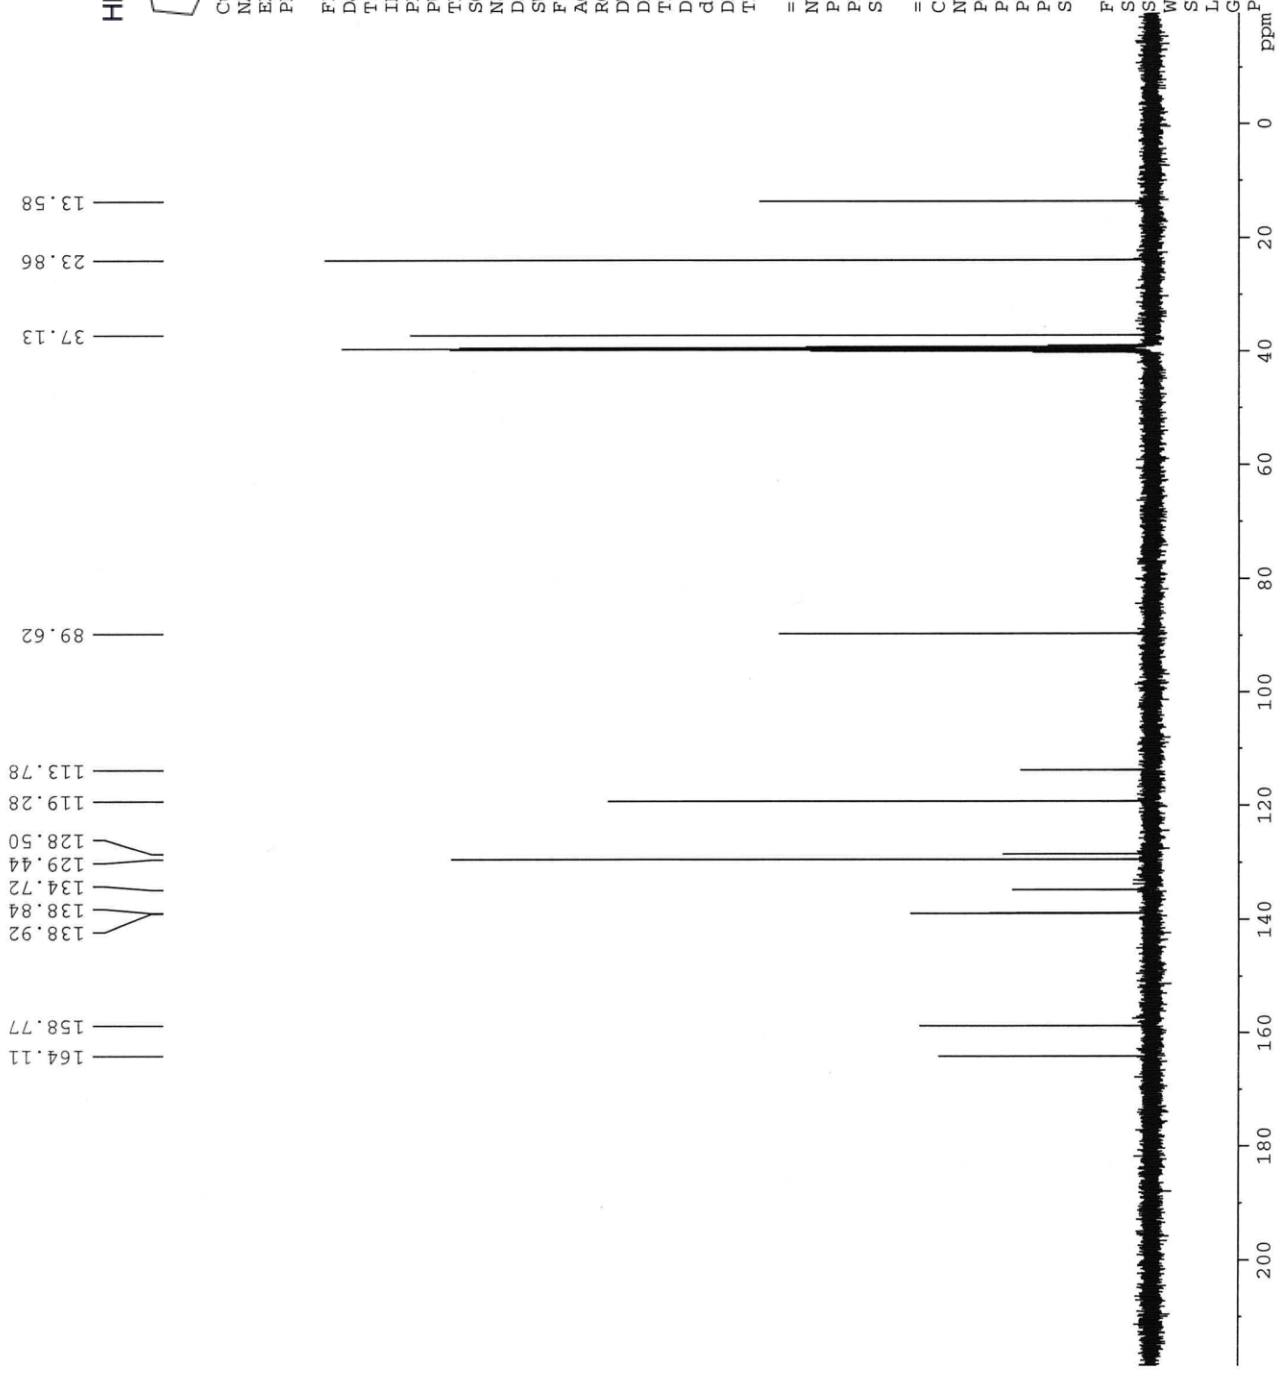

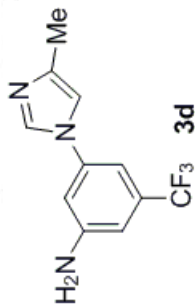

Current Data Parameters  
 NAME SU2-83  
 EXPNO 1  
 PROCNO 1

F2 - Acquisition Parameters  
 Date\_ 20110503  
 Time 9.36  
 INSTRUM spect  
 PROBHD 5 mm QNP 1H/13  
 PULPROG zg30  
 TD 65536  
 SOLVENT DMSO  
 NS 16  
 DS 2  
 SWH 8278.146 Hz  
 FIDRES 0.126314 Hz  
 AQ 3.9584243 sec  
 RG 287.4  
 DW 60.400 usec  
 DE 6.00 usec  
 TE 683.2 K  
 D1 1.00000000 sec  
 TDO 1

==== CHANNEL f1 =====  
 NUC1 1H  
 P1 14.00 usec  
 PL1 0.00 dB  
 SFO1 400.1324710 MHz

F2 - Processing parameters  
 SI 65536  
 SF 400.1300033 MHz  
 WDW no  
 SSB 0  
 LB 0.00 Hz  
 GB 0  
 PC 1.00

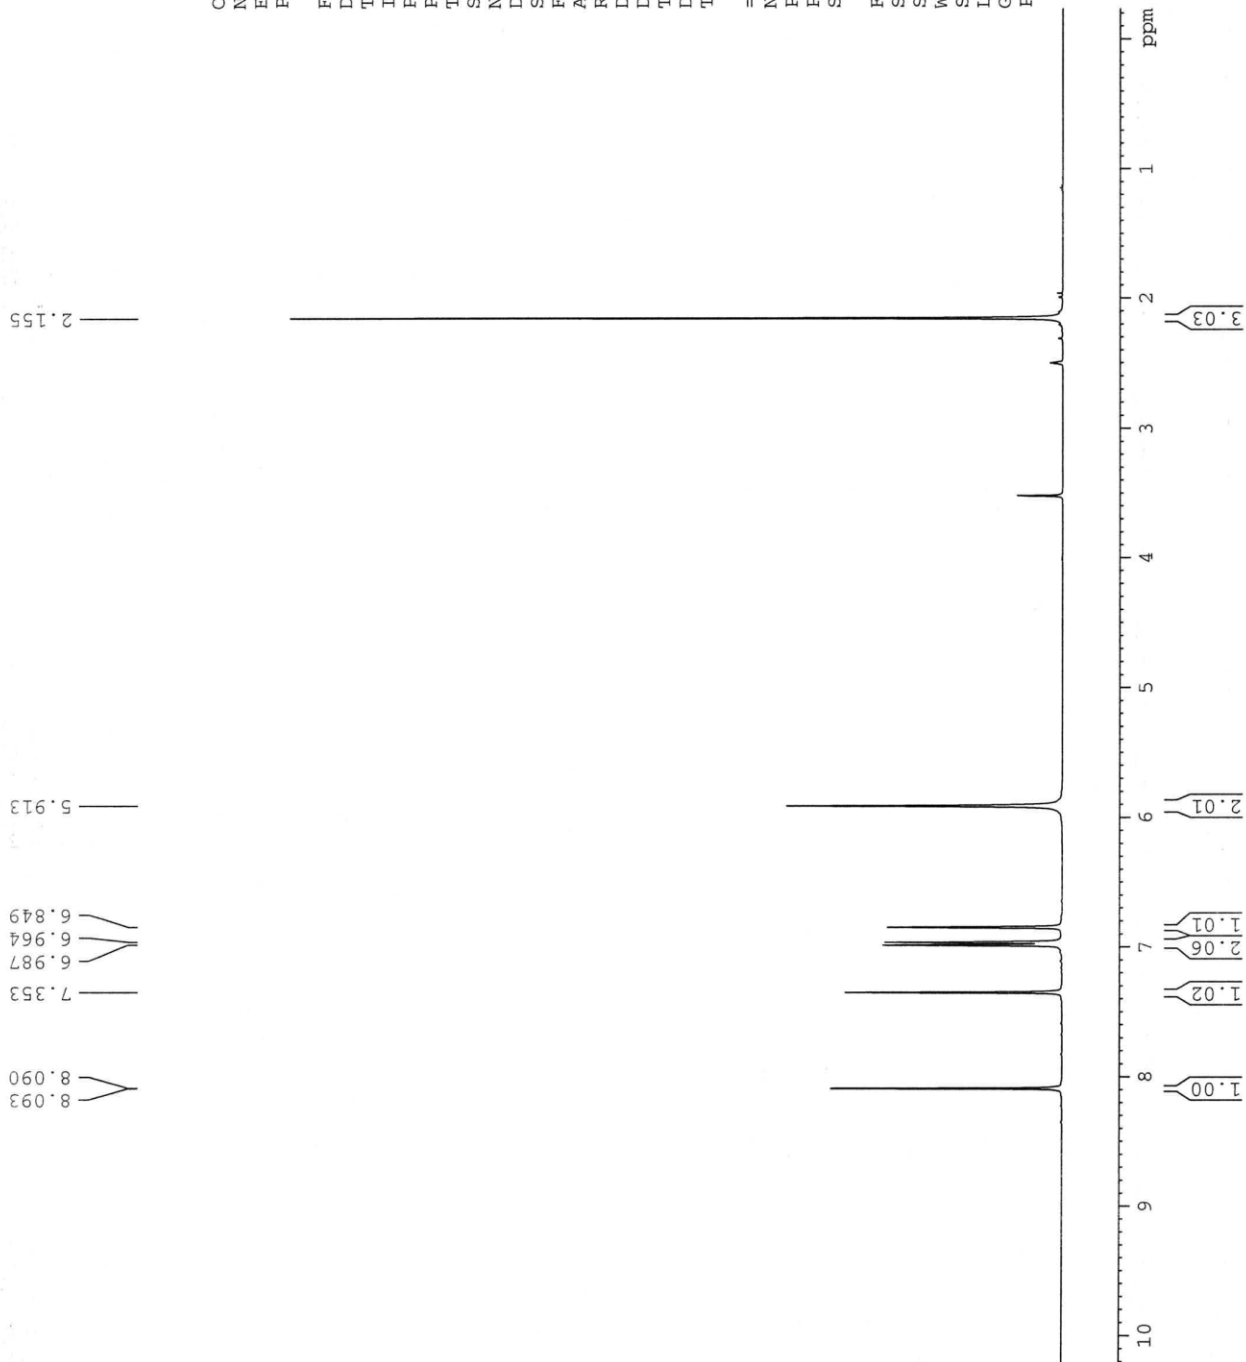

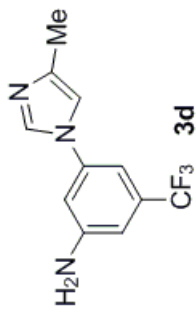

Current Data Parameters  
 NAME SU2-83C  
 EXPNO 1  
 PROCNO 1

F2 - Acquisition Parameters  
 Date\_ 20110503  
 Time 9.52  
 INSTRUM spect  
 PROBHD 5 mm QNP 1H/13  
 PULPROG zgpg30  
 TD 65536  
 SOLVENT DMSO  
 NS 256  
 DS 4  
 SWH 23980.814 Hz  
 FIDRES 0.365918 Hz  
 AQ 1.3664756 sec  
 RG 1625.5  
 DW 20.850 usec  
 DE 6.00 usec  
 TE 683.2 K  
 D1 2.00000000 sec  
 d11 0.03000000 sec  
 DELTA 1.89999998 sec  
 TDO 1

==== CHANNEL f1 =====  
 NUC1 13C  
 P1 9.38 usec  
 PL1 0.00 dB  
 SFO1 100.6228298 MHz  
 ===== CHANNEL f2 =====  
 CPDPRG2 waltz16  
 NUC2 1H  
 PCPD2 90.00 usec  
 PL2 0.00 dB  
 PL12 16.10 dB  
 PL13 19.00 dB  
 SFO2 400.1316005 MHz

F2 - Processing parameters  
 SI 32768  
 SF 100.6128080 MHz  
 MDW no  
 SSB 0  
 LB 0.00 Hz  
 GB 0  
 PC 1.40

150.90  
 138.53  
 138.52  
 134.78  
 131.81  
 131.81  
 131.49  
 131.18  
 130.86  
 128.13  
 125.42  
 122.72  
 120.01  
 114.21  
 107.96  
 103.39  
 103.35  
 103.32  
 103.28

13.49

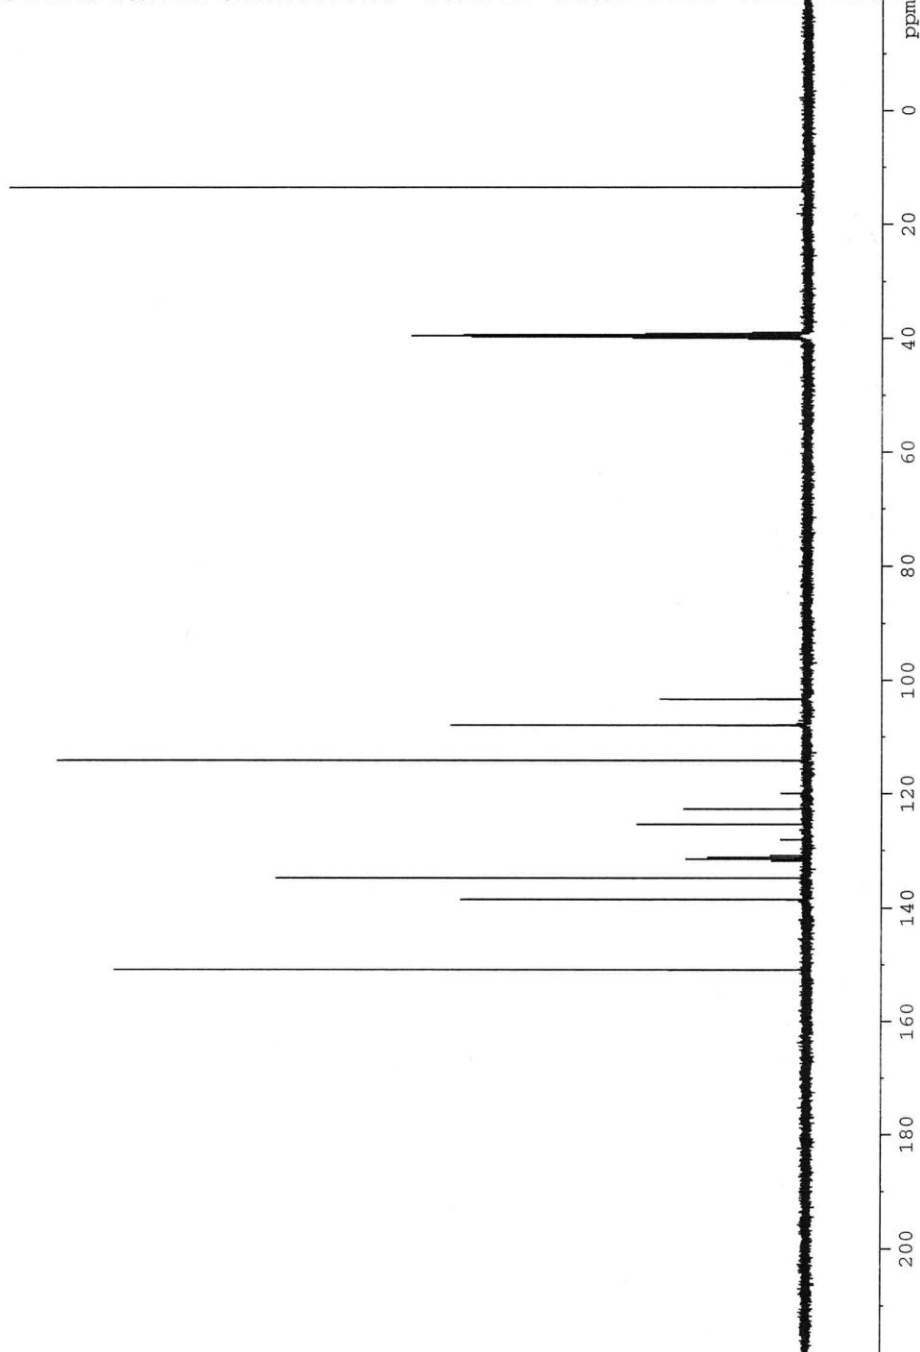



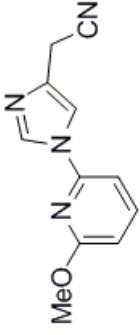

**3e**

Current Data Parameters  
 NAME SU2-12  
 EXENO 1  
 PROCNO 1

F2 - Acquisition Parameters  
 Date\_ 20110315  
 Time 12.28  
 INSTRUM spect  
 PROBD 5 mm QNP 1H/13  
 PULPROG zg30  
 TD 65536  
 SOLVENT CDCl3  
 NS 16  
 DS 2  
 SWH 8278.146 Hz  
 FIDRES 0.126314 Hz  
 AQ 3.9584243 sec  
 RG 114  
 DW 60.400 usec  
 DE 6.00 usec  
 TE 683.2 K  
 D1 1.00000000 sec  
 TD0 1

==== CHANNEL f1 =====  
 NUC1 1H  
 P1 14.00 usec  
 PL1 0.00 dB  
 SF01 400.1324710 MHz

F2 - Processing Parameters  
 SI 65536  
 SF 400.1300098 MHz  
 WDW no  
 SSB 0  
 LB 0.00 Hz  
 GB 0  
 PC 1.00

3.729  
 3.913

6.623  
 6.644  
 6.829  
 6.848  
 7.577  
 7.610  
 7.630  
 7.649  
 8.225

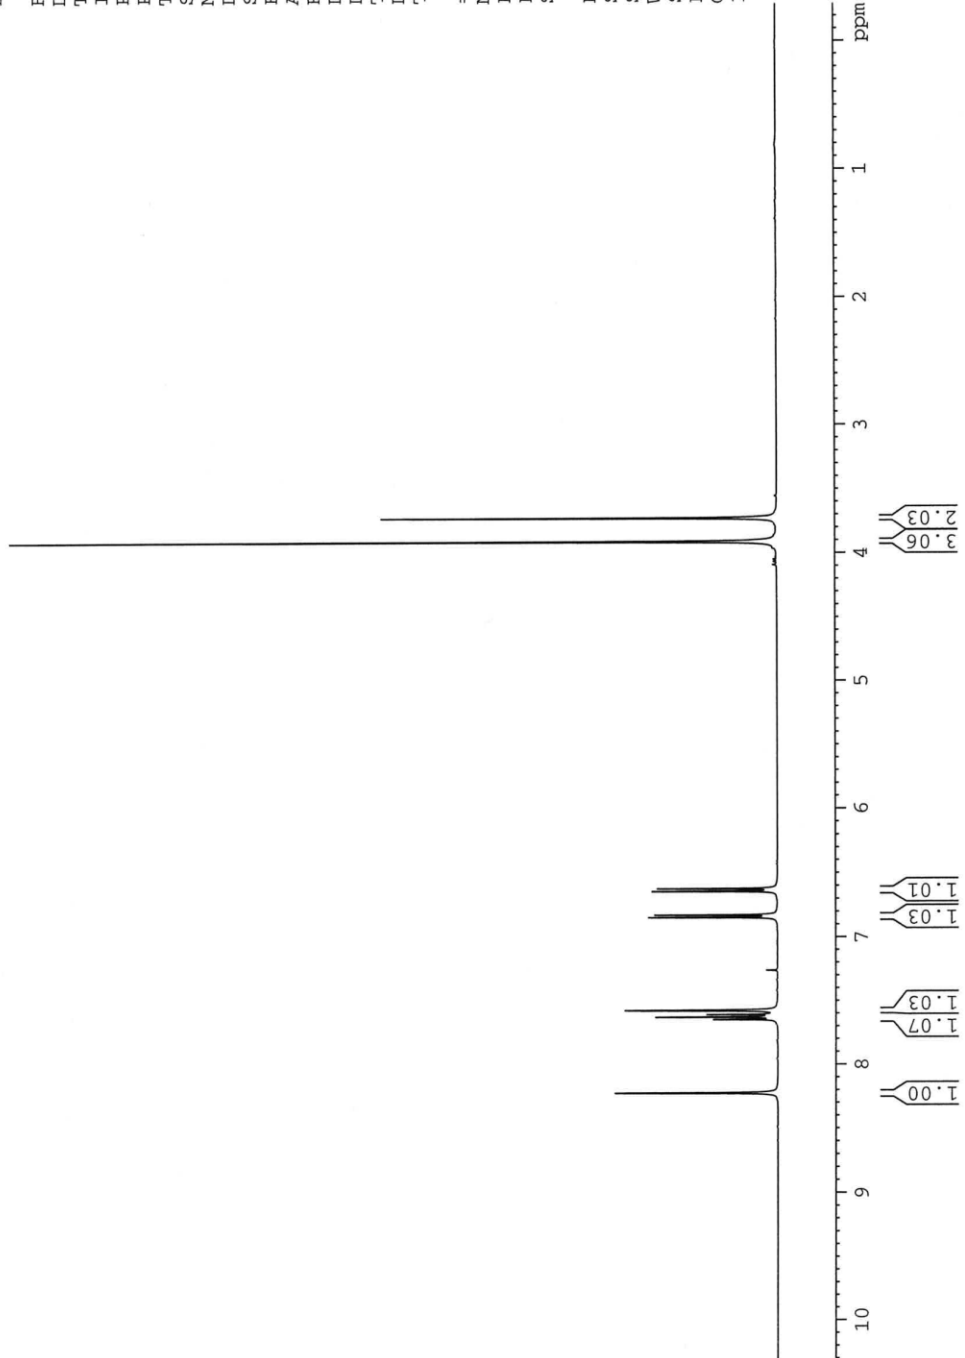

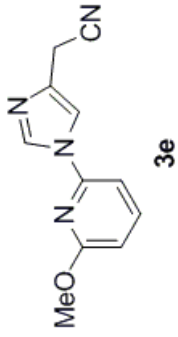

Current Data Parameters  
 NAME SU2-12C  
 EXPNO 1  
 PROCNO 1

F2 - Acquisition Parameters

Date\_ 20110315  
 Time 12.43  
 INSTRUM spect  
 PROBHD 5 mm QNP 1H/13  
 PULPROG zgpg30  
 TD 65536  
 SOLVENT CDCl3  
 NS 256  
 DS 4  
 SWH 23980.814 Hz  
 FIDRES 0.365918 Hz  
 AQ 1.3664756 sec  
 RG 1625.5  
 DW 20.850 usec  
 DE 6.00 usec  
 TE 683.2 K  
 D1 2.0000000 sec  
 d11 0.0300000 sec  
 DELTA 1.89999998 sec  
 TD0 1

==== CHANNEL f1 =====  
 NUC1 13C  
 P1 9.38 usec  
 PL1 0.00 dB  
 SFO1 100.6228298 MHz

==== CHANNEL f2 =====  
 CPDPRG2 waltz16  
 NUC2 1H  
 PCPD2 90.00 usec  
 PL2 0.00 dB  
 PL12 16.10 dB  
 PL13 19.00 dB  
 SFO2 400.1316005 MHz

F2 - Processing parameters  
 SI 32768  
 SF 100.6127634 MHz  
 WDW no  
 SSB 0  
 LB 0.00 Hz  
 GB 0  
 PC 1.40

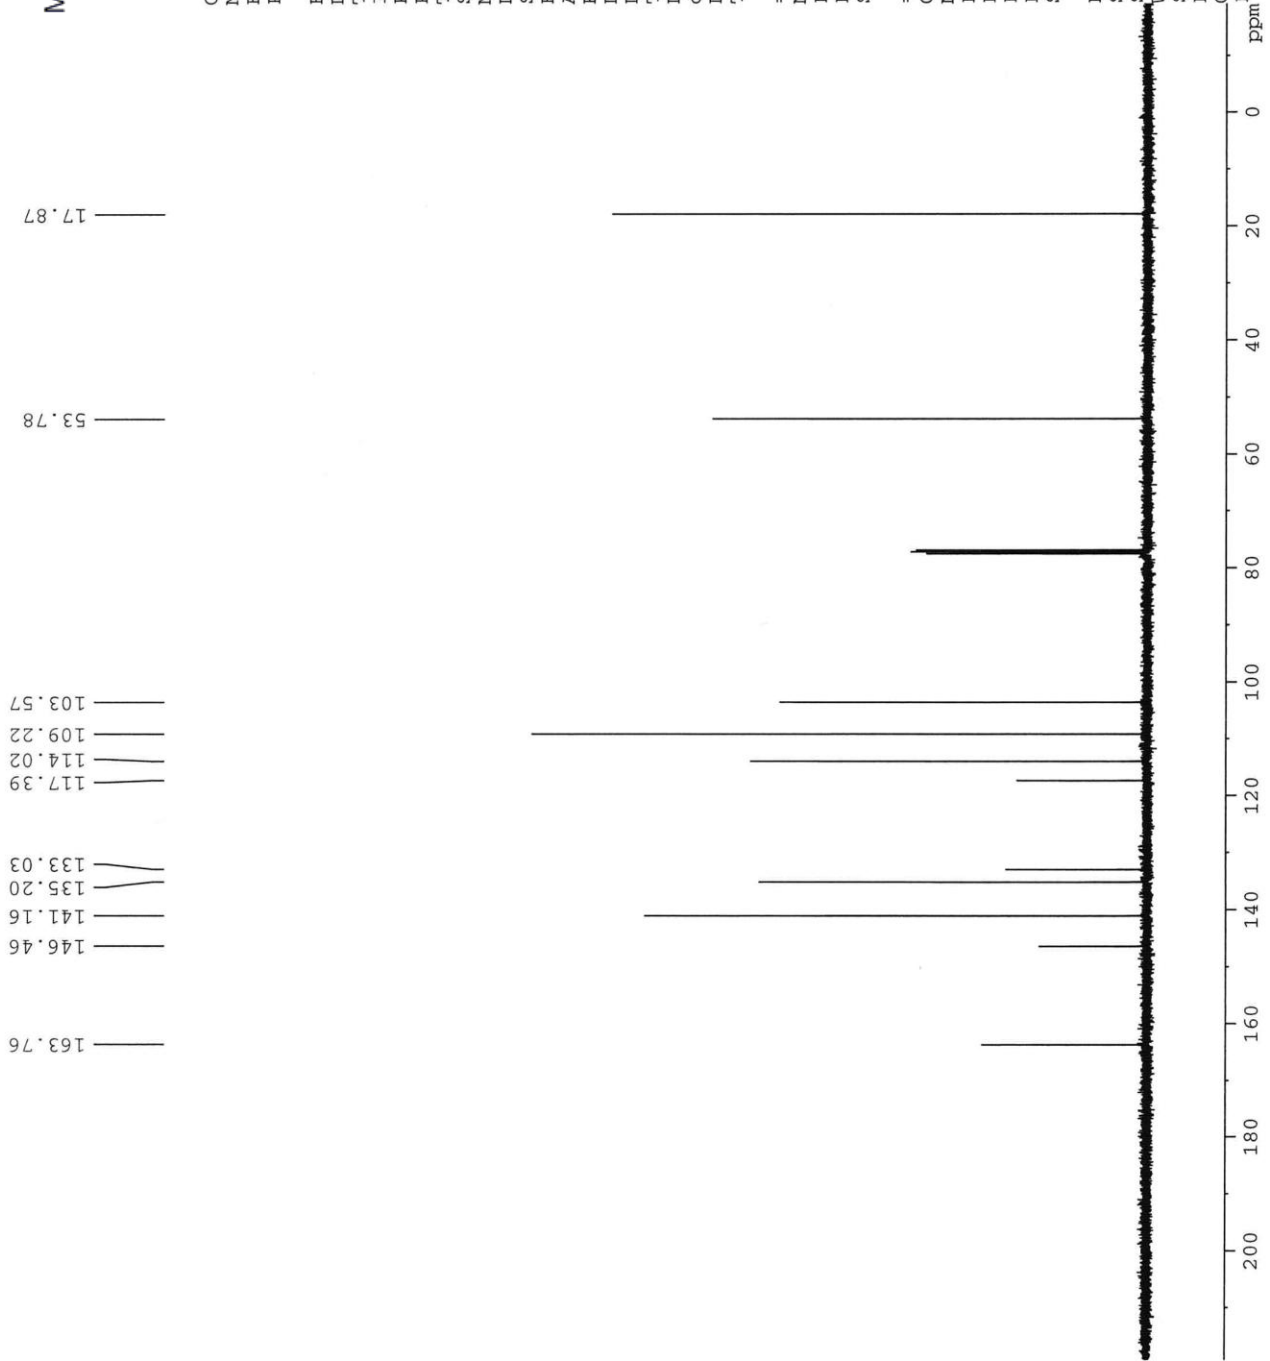



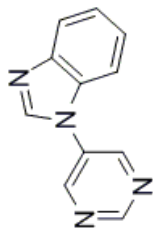

**3f**

Current Data Parameters  
 NAME SUI-223C  
 EXPNO 1  
 PROCNO 1

F2 - Acquisition Parameters  
 Date\_ 20110727  
 Time 9.12  
 INSTRUM spect  
 PROBHD 5 mm QNP 1H/13  
 PULPROG zgpg30  
 TD 65536  
 SOLVENT CDCl3  
 NS 128  
 DS 4  
 SWH 23980.814 Hz  
 FIDRES 0.365918 Hz  
 AQ 1.3664756 sec  
 RG 1625.5  
 DW 20.850 usec  
 DE 6.00 usec  
 TE 683.2 K  
 D1 2.00000000 sec  
 d11 0.03000000 sec  
 DELTA 1.89999998 sec  
 TD0 1

==== CHANNEL f1 =====  
 NUC1 13C  
 P1 9.38 usec  
 PL1 0.00 dB  
 SFO1 100.6228298 MHz

==== CHANNEL f2 =====  
 CPDPRG2 waltz16  
 NUC2 1H  
 PCPD2 90.00 usec  
 PL2 0.00 dB  
 PL12 16.10 dB  
 PL13 19.00 dB  
 SFO2 400.1316005 MHz

F2 - Processing parameters  
 SI 32768  
 SF 100.6127625 MHz

WDW no  
 SSB 0  
 LB 0.00 Hz  
 GB 0  
 PC 1.40

157.76  
 151.92  
 144.17  
 141.32  
 133.05  
 132.05  
 124.76  
 123.82  
 121.23  
 109.67

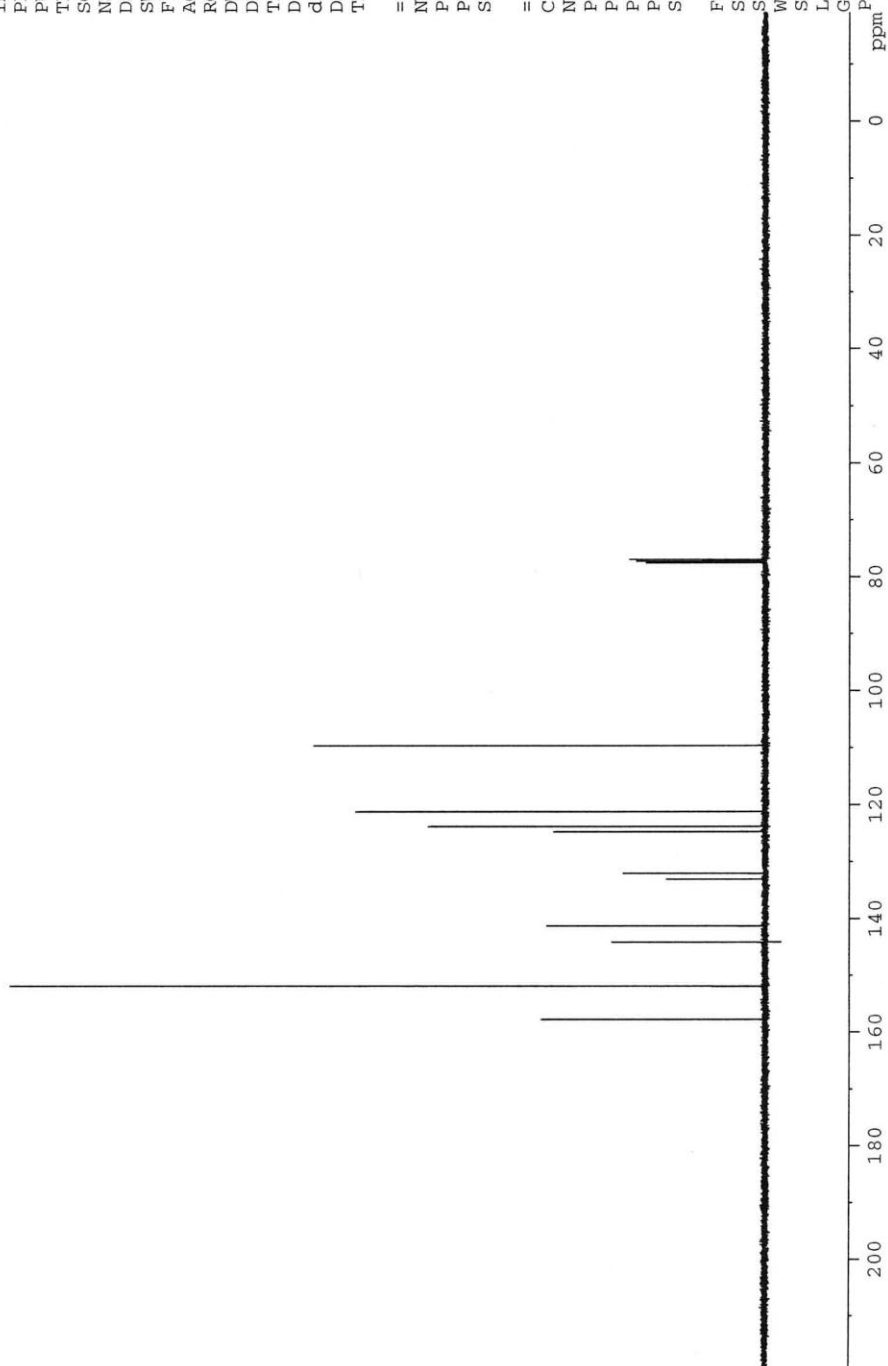

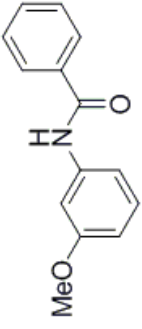

Current Data Parameters  
 NAME SU1-280  
 EXPNO 1  
 PROCNO 1

F2 - Acquisition Parameters  
 Date\_ 20110219  
 Time 9.59  
 INSTRUM spect  
 PROBHD 5 mm QNP 1H/13  
 PULPROG zg30  
 TD 65536  
 SOLVENT CDC13  
 NS 8  
 DS 2  
 SWH 8278.146 Hz  
 FIDRES 0.126314 Hz  
 AQ 3.9584243 sec  
 RG 57  
 DW 60.400 usec  
 DE 6.00 usec  
 TE 296.2 K  
 D1 1.00000000 sec  
 TD0 1

==== CHANNEL f1 =====  
 NUC1 1H  
 P1 14.00 usec  
 PL1 0.00 dB  
 SFO1 400.1324710 MHz

F2 - Processing parameters  
 SI 65536  
 SF 400.1300212 MHz  
 WDW no  
 SSB 0  
 LB 0.00 Hz  
 GB 0  
 PC 1.00

8.663  
7.789  
7.787  
7.769  
7.766  
7.430  
7.427  
7.424  
7.409  
7.404  
7.393  
7.390  
7.387  
7.308  
7.288  
7.270  
7.181  
7.177  
7.166  
7.162  
7.157  
7.144  
7.124  
6.658  
6.652  
6.646  
6.640  
6.635  
6.629

3.672

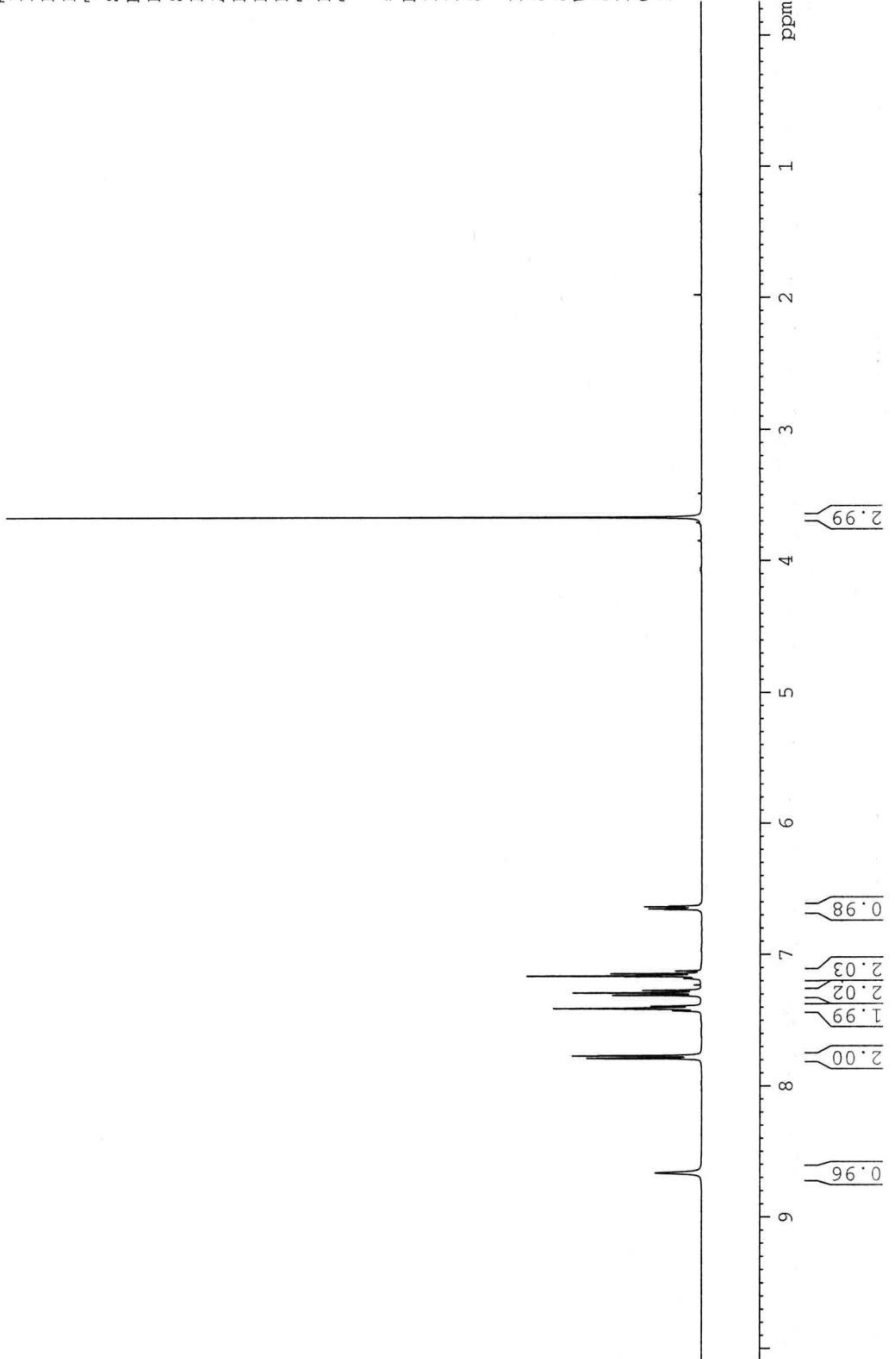

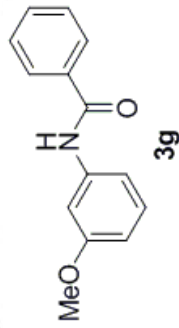

Current Data Parameters  
 NAME SUI-280C  
 EXPNO 1  
 PROCNO 1

F2 - Acquisition Parameters  
 Date\_ 20110219  
 Time 10.07  
 INSTRUM spect  
 PROBHD 5 mm QNP 1H/13  
 PULPROG zgpg30  
 TD 65536  
 SOLVENT CDCl3  
 NS 128  
 DS 4  
 SWH 23980.814 Hz  
 FIDRES 0.365918 Hz  
 AQ 1.3664756 sec  
 RG 4096  
 DW 20.850 usec  
 DE 6.00 usec  
 TE 296.2 K  
 D1 2.00000000 sec  
 d11 0.03000000 sec  
 DELTA 1.89999998 sec  
 TD0 1

==== CHANNEL f1 =====  
 NUC1 13C  
 P1 9.38 usec  
 PL1 0.00 dB  
 SFO1 100.6228298 MHz

==== CHANNEL f2 =====  
 CPDPRG2 waltz16  
 NUC2 1H  
 PCPD2 90.00 usec  
 PL2 0.00 dB  
 PL12 16.10 dB  
 PL13 19.00 dB  
 SFO2 400.1316005 MHz

F2 - Processing parameters  
 SI 32768  
 SF 100.6127704 MHz

WDW no  
 SSB 0  
 LB 0.00 Hz  
 GB 0  
 PC 1.40

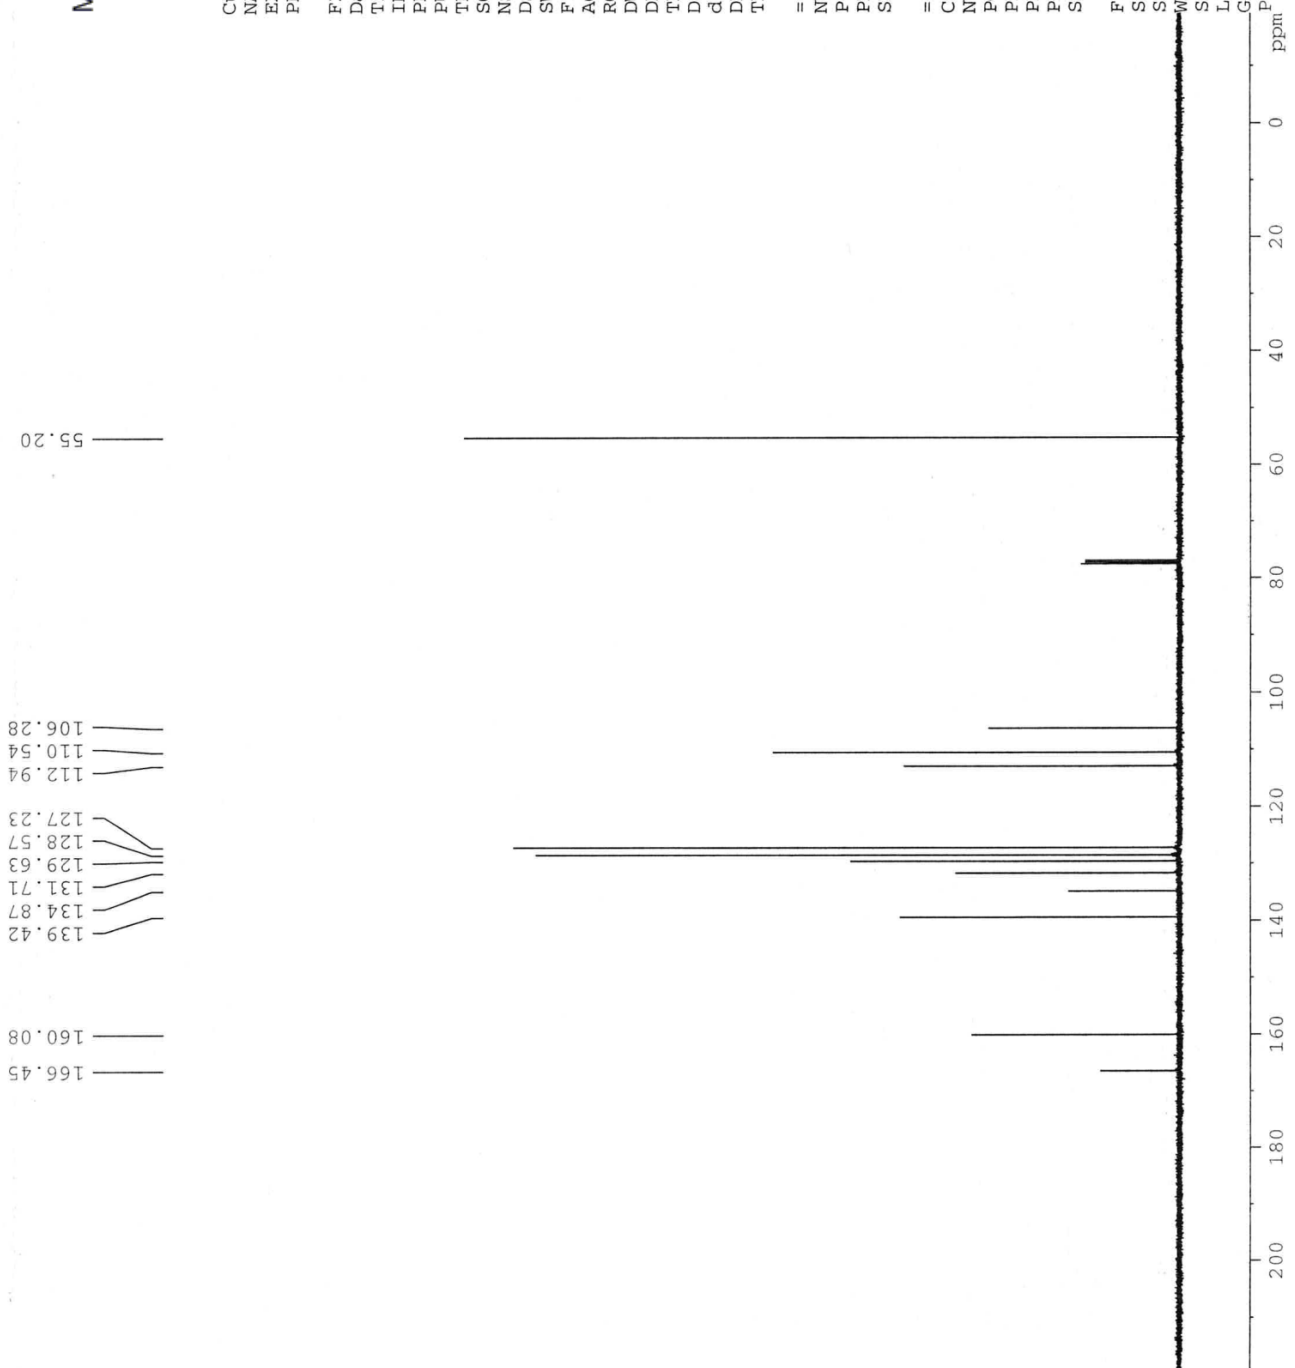

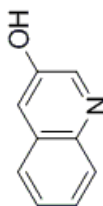

3h

Current Data Parameters  
 NAME SU1-281  
 EXPNO 1  
 PROCNO 1

F2 - Acquisition Parameters  
 Date\_ 20110219  
 Time 10.10  
 INSTRUM spect  
 PROBHD 5 mm QNP 1H/13  
 PULPROG zg30  
 TD 65536  
 SOLVENT DMSO  
 NS 8  
 DS 2  
 SWH 8278.146 Hz  
 FIDRES 0.126314 Hz  
 AQ 3.9584243 sec  
 RG 256  
 DW 60.400 usec  
 DE 6.00 usec  
 TE 296.2 K  
 D1 1.00000000 sec  
 TD0 1

==== CHANNEL f1 =====  
 NUC1 1H  
 P1 14.00 usec  
 PL1 0.00 dB  
 SFO1 400.1324710 MHz

F2 - Processing parameters  
 SI 65536  
 SF 400.1300034 MHz  
 WDW no  
 SSB 0  
 LB 0.00 Hz  
 GB 0  
 PC 1.00

10.313  
 8.602  
 8.595  
 7.915  
 7.910  
 7.908  
 7.901  
 7.899  
 7.895  
 7.891  
 7.794  
 7.790  
 7.784  
 7.777  
 7.770  
 7.511  
 7.504  
 7.499  
 7.493  
 7.484  
 7.474  
 7.469  
 7.457

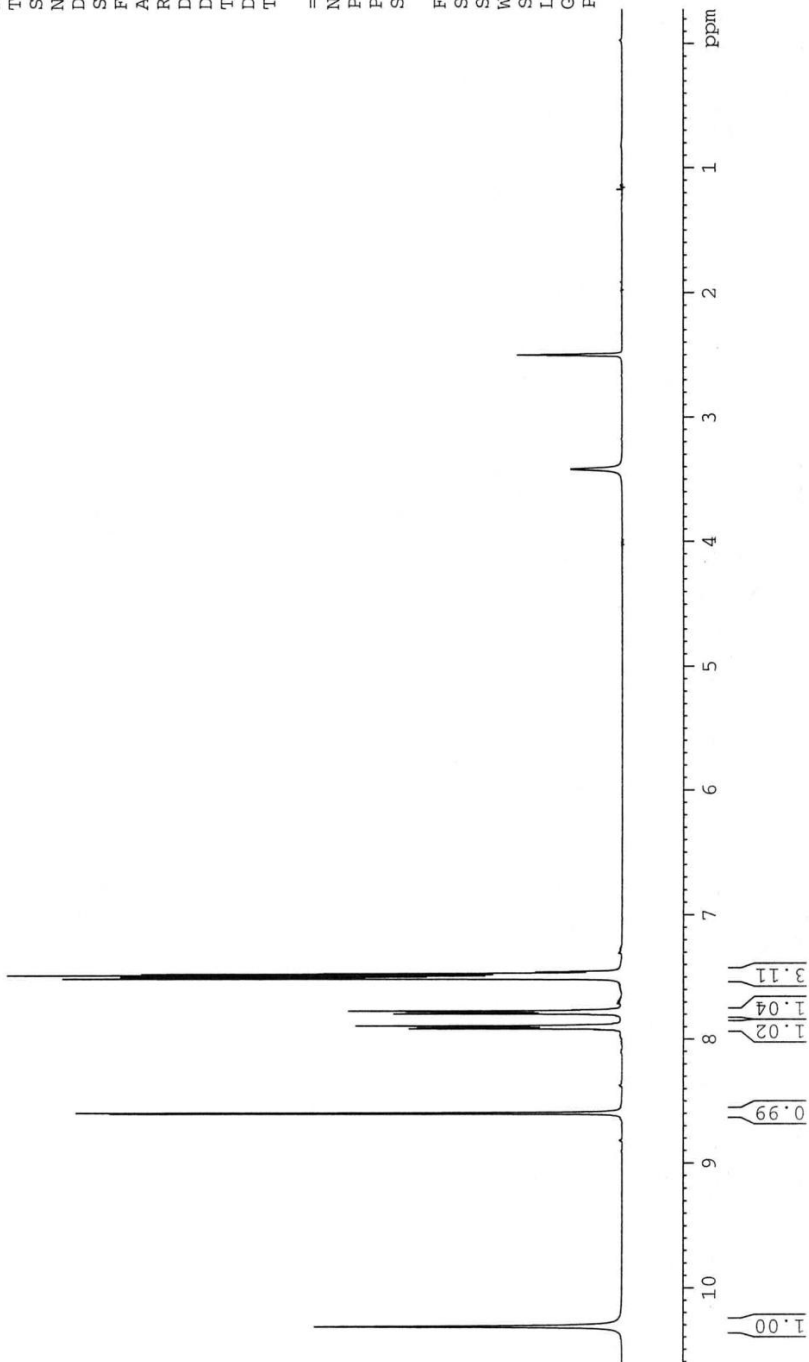

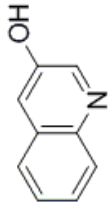

3h

150.92  
143.95  
142.47  
129.07  
128.64  
126.72  
126.53  
125.84  
115.29

Current Data Parameters  
 NAME SU1-281C  
 EXPNO 1  
 PROCNO 1

F2 - Acquisition Parameters

Date\_ 20110219  
 Time 10.18  
 INSTRUM spect  
 PROBHD 5 mm QNP 1H/13  
 PULPROG zgpg30  
 TD 65536  
 SOLVENT DMSO  
 NS 128  
 DS 4  
 SWH 23980.814 Hz  
 FIDRES 0.365918 Hz  
 AQ 1.3664756 sec  
 RG 1625.5  
 DW 20.850 usec  
 DE 6.00 usec  
 TE 296.2 K  
 D1 2.0000000 sec  
 d11 0.0300000 sec  
 DELTA 1.89999998 sec  
 TD0 1

==== CHANNEL f1 =====  
 NUC1 13C  
 P1 9.38 usec  
 PL1 0.00 dB  
 SFO1 100.6228298 MHz

==== CHANNEL f2 =====  
 CPDPRG2 waltz16  
 NUC2 1H  
 PCPD2 90.00 usec  
 PL2 0.00 dB  
 PL12 16.10 dB  
 PL13 19.00 dB  
 SFO2 400.1316005 MHz

F2 - Processing parameters  
 SI 32768  
 SF 100.6128141 MHz

WDW no  
 SSB 0  
 LB 0  
 GB 0  
 PC 1.40

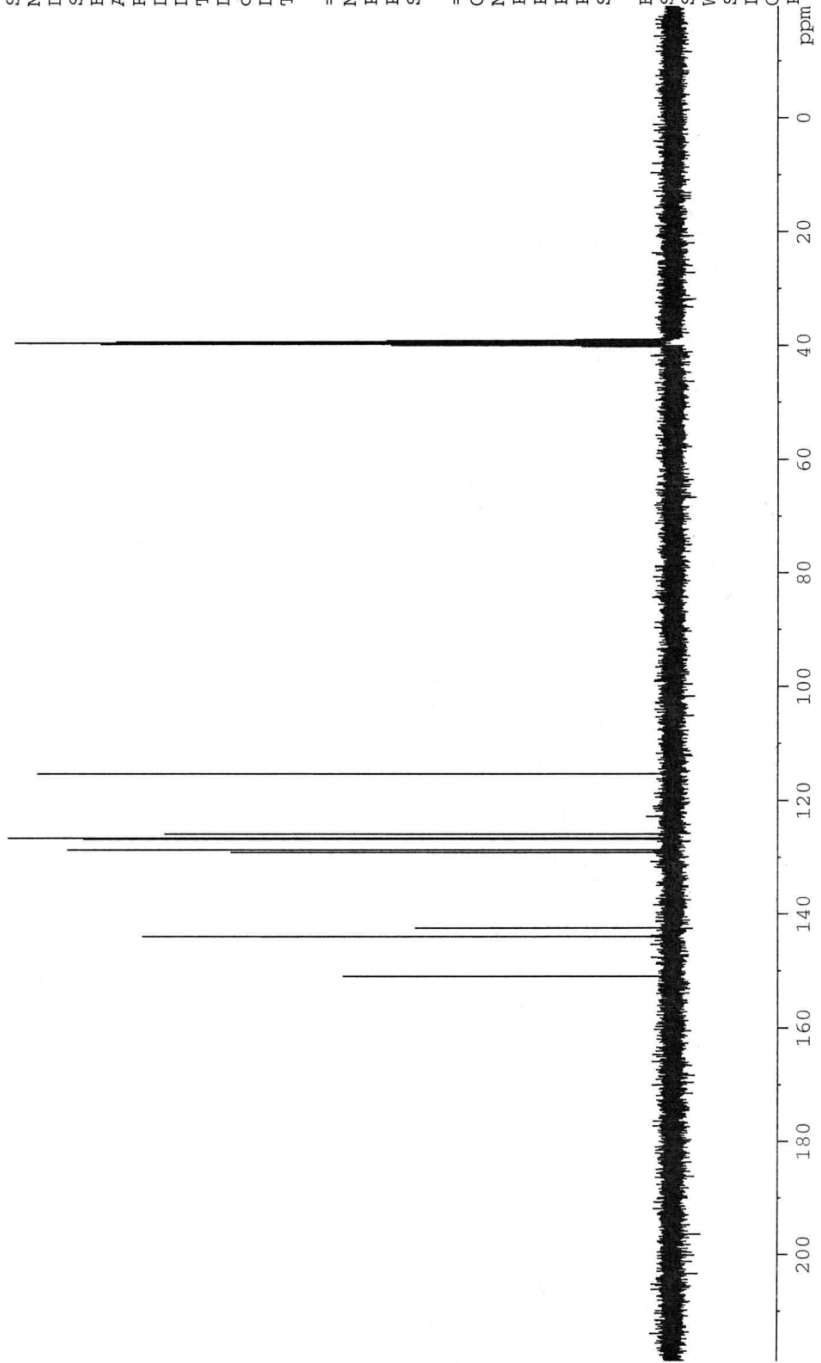



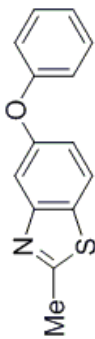

3i

Current Data Parameters  
 NAME SU2-88  
 EXNO 1  
 PROCNO 1

F2 - Acquisition Parameters  
 Date\_ 20110506  
 Time 10.03  
 INSTRUM spect  
 PROBHD 5 mm QNP 1H/13  
 PULPROG zg30  
 TD 65536  
 SOLVENT CDC13  
 NS 8  
 DS 2  
 SWH 8278.146 Hz  
 FIDRES 0.126314 Hz  
 AQ 3.9584243 sec  
 RG 322.5  
 DW 60.400 usec  
 DE 6.00 usec  
 TE 300.0 K  
 D1 1.00000000 sec  
 TD0 1

==== CHANNEL f1 =====  
 NUC1 1H  
 P1 14.00 usec  
 PL1 0.00 dB  
 SFO1 400.1324710 MHz

F2 - Processing parameters  
 SI 65536  
 SF 400.1300095 MHz  
 WDW no  
 SSB 0  
 LB 0.00 Hz  
 GB 0  
 PC 1.00

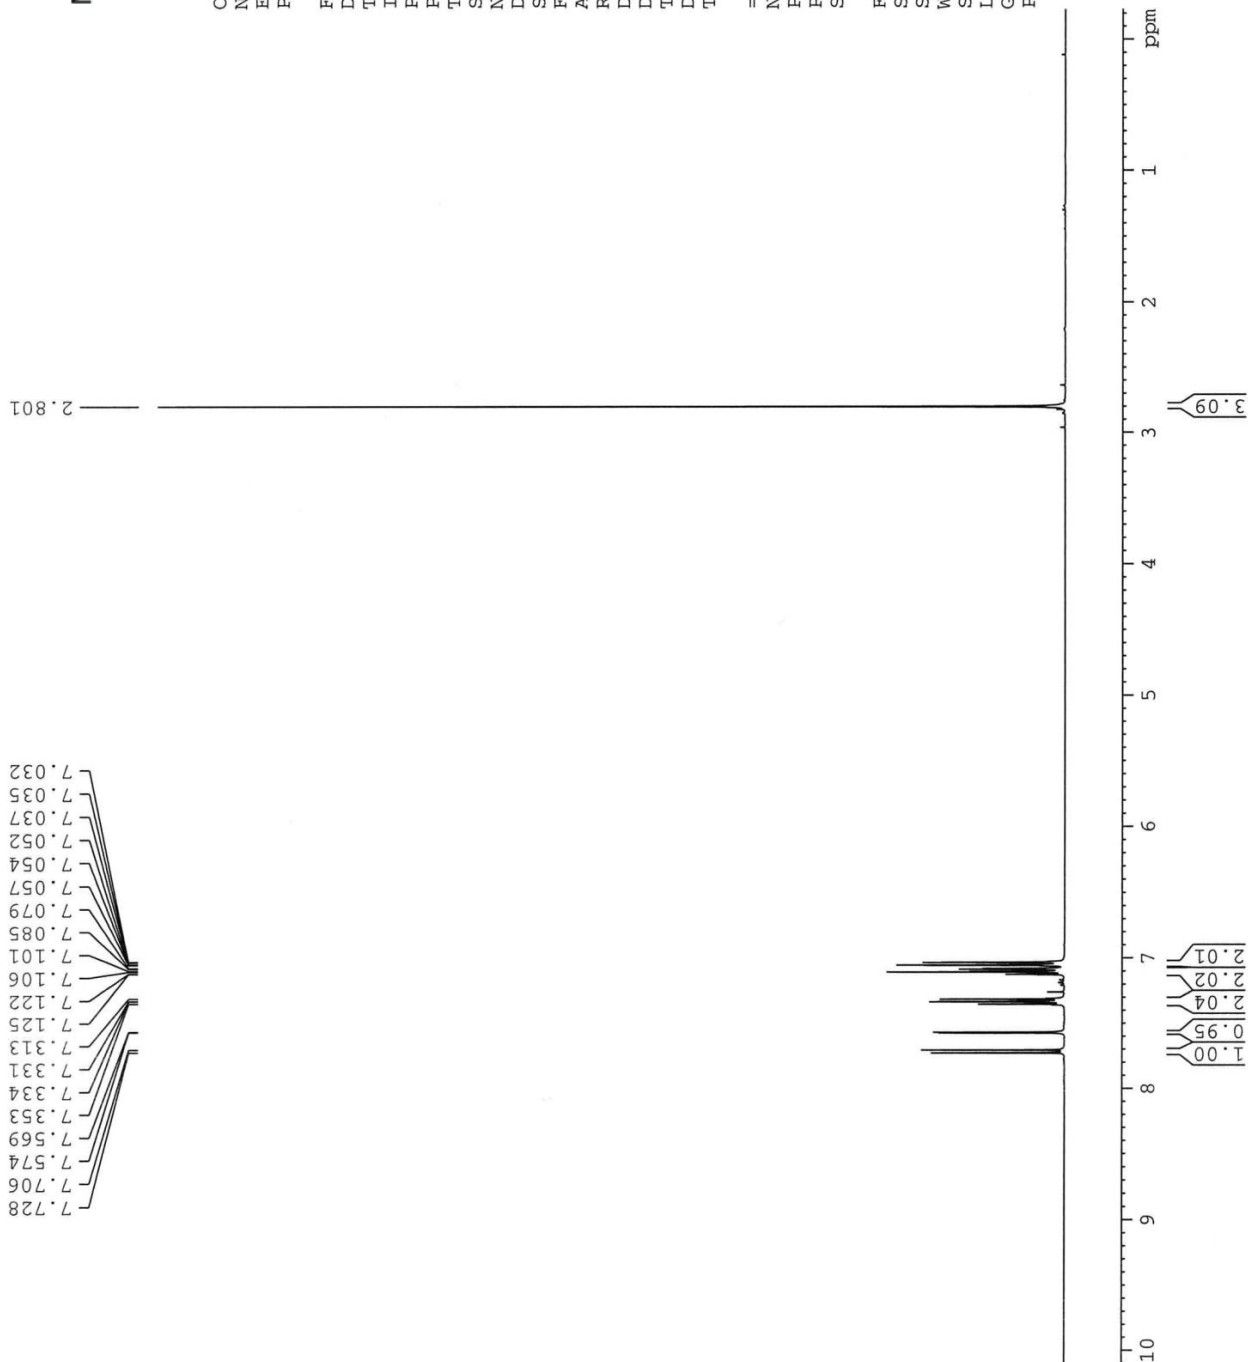

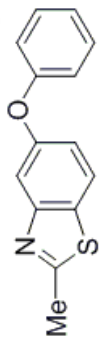

3i

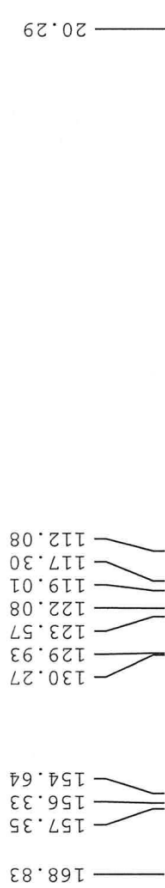

Current Data Parameters  
 NAME SU2-88C  
 EXPNO 1  
 PROCNO 1

F2 - Acquisition Parameters  
 Date\_ 20110506  
 Time 10.11  
 INSTRUM spect  
 PROBHD 5 mm QNP 1H/13  
 PULPROG zgpg30  
 TD 65536  
 SOLVENT CDCl3  
 NS 128  
 DS 4  
 SWH 23980.814 Hz  
 FIDRES 0.365918 Hz  
 AQ 1.3664756 sec  
 RG 5792.6  
 DW 20.850 usec  
 DE 6.00 usec  
 TE 683.2 K  
 D1 2.0000000 sec  
 d11 0.0300000 sec  
 DELTA 1.89999998 sec  
 TD0 1

==== CHANNEL f1 =====  
 NUC1 13C  
 P1 9.38 usec  
 PL1 0.00 dB  
 SFO1 100.6228298 MHz

==== CHANNEL f2 =====  
 CPDPRG2 waltz16  
 NUC2 1H  
 PCPD2 90.00 usec  
 PL2 0.00 dB  
 PL12 16.10 dB  
 PL13 19.00 dB  
 SFO2 400.1316005 MHz

F2 - Processing parameters  
 SI 32768  
 SF 100.6127619 MHz  
 MDW no  
 SSB 0  
 LB 0.00 Hz  
 GB 0  
 PC 1.40

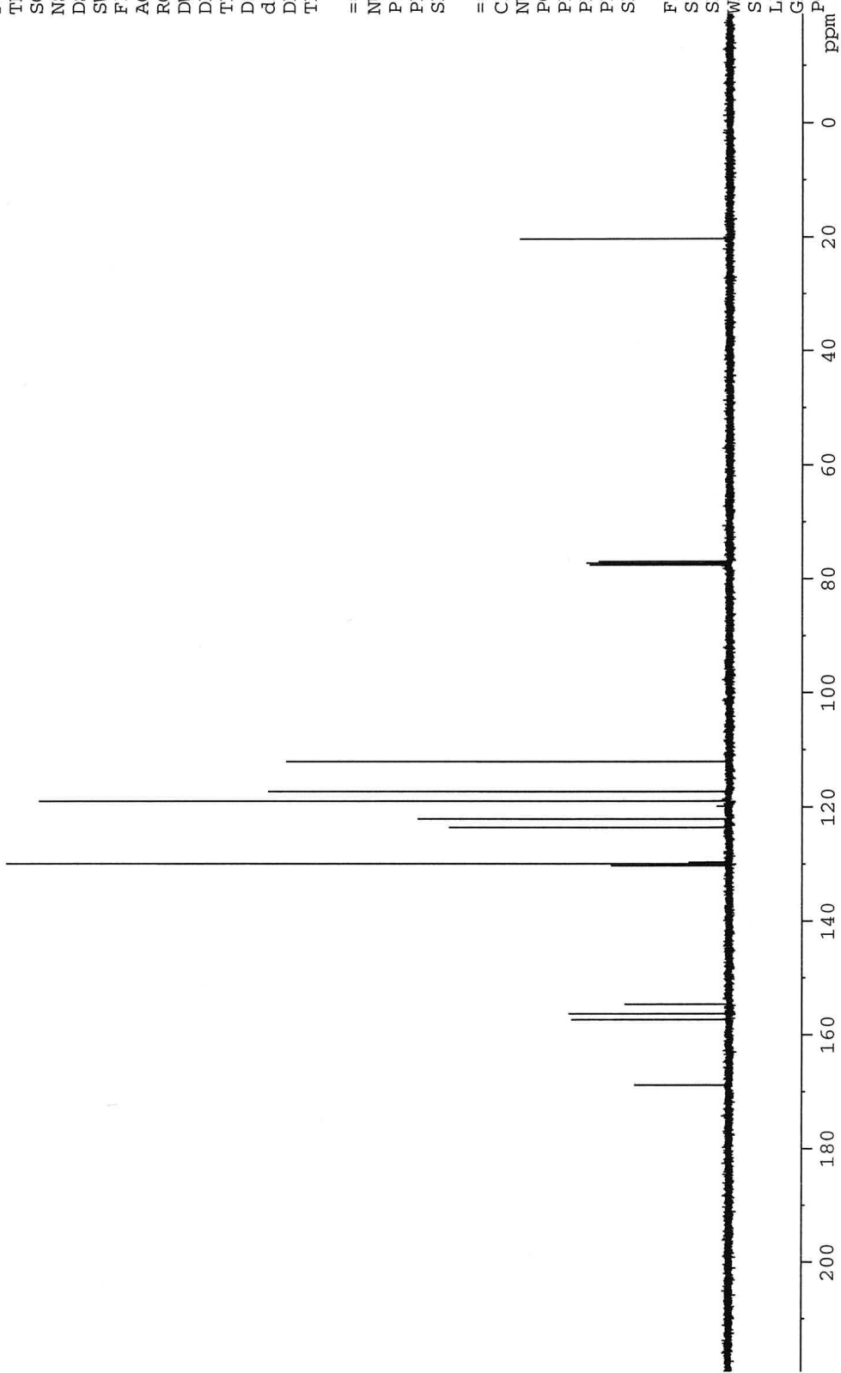

Supplement: NIHMS356354-supplement-1_si_001.pdf [file NIHMS356354-supplement-1_si_001.pdf]
